# 1 **Histopathological analysis of selected organs of *Oreochromis niloticus* due to** 2 **sub-lethal industrial effluents exposure.**

3 <sup>1</sup>\*Ghazala Jabeen, <sup>1</sup>Sarwat Ishaq and <sup>1</sup>Farkhanda Manzoor

4 <sup>1</sup>Department of Zoology, Lahore College for Women University, Lahore

5 \*Corresponding author's email: drghazalajabeen@gmail.com

## 6 **Abstract**

7 On a daily basis, our environment is exposed to tons of a composite of industrial effluents, which  
8 has a negative impact on commercial fish production and, as a result, on humans. Present study  
9 was designed to evaluate the acute, sub-chronic, and chronic toxicity of a composite of raw  
10 industrial effluent from Sunder Industrial Estate in the freshwater fish *Oreochromis niloticus*  
11 biosystem by investigating at the histopathological changes in different organs such as heart,  
12 kidney, and muscle after exposure. Fish was exposed to 1/3<sup>rd</sup>, 1/5<sup>th</sup> and 1/10<sup>th</sup> of predetermined  
13 LC<sub>50</sub>. Significant histopathological alterations in heart (myocarditis, pericardium bending and  
14 lifting) kidney (renal tube degeneration, glomerulus structural alteration and necrotic proximal  
15 tubule) and muscle (inflammation, atrophy and tumor) were observed in treated groups. After the  
16 sub-lethal exposure histological alteration index (HAI) was highest in chronic group as compared  
17 to the acute and sub-chronic group as  $HAI_{\text{group D}} > HAI_{\text{group C}} > HAI_{\text{group B}}$ . Moreover physic-  
18 chemical parameters of water were found to be out of the range of the APHA standard approach.

## 19 **Introduction**

20 The addition of undesired substances into water bodies causes changes in the aquatic system's  
21 physical, chemical, and biological features, resulting in ecological imbalance (1). Industrial  
22 effluents contribute significantly to water contamination, endangering aquatic plants and animals  
23 (2). Because Industrial effluents contain variety of heavy metals (3), phenols (4) and genotoxins

24 (5) etc. The aquatic flora and wildlife, notably fish, are steadily declining as a result of pollution  
25 (6).

26 As a result of untreated wastewater, fish have pathogenic abnormalities. Under chronic exposure  
27 conditions, these exposure concentrations may not even be harmful for the affected species, but  
28 they could include an impact on the internal structures and functions, affecting the performance  
29 of vital processes and functions such as environmental resistance and competitive stress, growth  
30 and reproduction (7).

31 Even at very low concentrations, long-term exposure to water contaminants has been found to  
32 cause histological, biochemical alterations and morphological changes in fish tissues and organs,  
33 which may have a major impact on fish quality and perhaps fish survival rate in water ((8) and  
34 (9)). In laboratory and field research, histopathological changes have been used as indicators in  
35 monitoring the fish health exposed to toxicants. Changes in these organs are frequently simpler  
36 to detect than functional changes, and they serve as early warning signs of animal illness (10).

37 Histopathological study has proved to be an extremely sensitive metric for detecting cellular  
38 changes in target organs (11). Histopathological biomarkers have a variety of advantages when it  
39 comes to detecting long-term damage in aquatic species, and they're probably the easiest chronic  
40 biomarkers to apply in aquatic biology. Biomarkers of contamination exposure in species of fish  
41 are crucial indicators if we are to maintain a profitable fishery and a healthy product for men  
42 consumption and health (12).

43 Fish is a significant source of animal protein, particularly for people on a limited budget (13).  
44 Pollution and changes in their surroundings make fish particularly vulnerable. In polluted aquatic  
45 ecosystem, fish health is used as an indicator ((14), (15)). Before causing changes in fish  
46 behavior or appearance, pollution's harmful effects may manifest at the cellular or tissue level

47 (16). Examination of fish histology could be used as a bio-monitoring approach for water  
48 contamination, according to (17). Several investigations have documented histological  
49 alterations in fish exposed to effluents, in recent years ((18) and (19)).

50 Our environment is exposed to tons of industrial effluents on daily basis. According to several  
51 studies, a mixture of industrial effluents causes considerable changes in fish ((20), (21) and (22)).

52 As a result, the current study attempted to investigate the variation produced by a composite of  
53 industrial effluents at different concentrations in *Oreochromis niloticus* vital organs (kidney,  
54 heart, and muscle), as well as the interaction between effluent toxicity and histological  
55 abnormalities.

## 56 **Materials and Methods**

57 The study area was Sundar Industrial Estate, one of Lahore's most rapidly developing and  
58 polluted industrial regions. The industrial region covers 1750 acres of land and is home to 400  
59 major and medium sized businesses such as engineering, chemical, paint, pharmaceutical, textile,  
60 and food businesses (Figure #1). The study region is located between 31.2883° N and 74.1739°  
61 E. Water from these industries is discharged into the land on a regular basis. The people who live  
62 in the vicinity of these locations are at risk of being polluted by the environment.

63 As stock solutions, raw unfiltered effluents from Sunder Industrial Estate were collected from the  
64 points of discharge of the Textile, Tannery, and Chemical industries (1.5 L). All of the samples  
65 were taken in triplicate. "Standard Methods for Examination of Water and Wastewater" was used  
66 to record physico-chemical parameters (23). Following that, required amounts were measured  
67 into calibrated glass containers and built up to the needed concentration using the toxicity  
68 evaluation techniques provided by (24).

69 The experiment was conducted at three durations of 3-day, 15-day and 180-day. According to the  
70 study design followed by the guidelines of OECD, 2019, healthy juveniles were exposed to sub-  
71 lethal doses (1/3rd, 1/5th and 1/10th concentrations) of 96-hour LC<sub>50</sub> value. In 3 days, 15 days,  
72 and six month static/renewal bioassay for 1/3<sup>rd</sup>, 1/5<sup>th</sup> and 1/10<sup>th</sup> of LC<sub>50</sub> exposure doses and  
73 control exposures (0.00%) devoid of effluent mixes were employed. The 1/3<sup>rd</sup>, 1/5<sup>th</sup>, and 1/10<sup>th</sup>  
74 concentrations of 96-hour LC<sub>50</sub> value from exposures to predefined levels (v/v) of a composite  
75 of industrial effluents were 6%, 3.6%, and 1.8%, respectively. Healthy juveniles of (n=100),  
76 *Oreochromis niloticus* with an average weight of (10±2g) and length (3±0.5 inch) were  
77 transported in oxygenated waterproof bags to the Aquaculture Facility in the Department of  
78 Zoology, Lahore College for Women University, Lahore, Pakistan, Fish were kept in tanks  
79 filled with dechlorinated tap water for seven days to allow them to adjust to their new  
80 surroundings. Fish were fed a 40% crude protein diet at 3% body weight on a daily basis, with  
81 uneaten food being siphoned off on a frequent basis to prevent the accumulation of metabolites.  
82 Following acclimatization, fish were exposed to 1/3rd, 1/5th, and 1/10th of the LC50  
83 concentrations of 6%, 3.6% and 1.8% respectively.

84 Animal health and behavior were monitored by observing the sub-lethal clinical signs exhibited  
85 by the fish during the exposure experiment in order to improve the analysis to examine the  
86 industrial effluent toxicity and reduce the animal suffering by following the recommendations on  
87 the identification, assessment, analysis, and use of clinical signs as humane endpoints for  
88 experimental animals used in safety evaluation for mammalian studies (OECD, 2000; OECD,  
89 2019; EPA, 2007, 2012). The fish were monitored for consecutively 8 hours immediately after  
90 the start of exposure (day 0-1). Afterwards, 2 observations were conducted during the first 24  
91 hours of the experiments at an interval of 3 hours. From the 2nd day to the end of the

92 experiment, control and treated fish were inspected twice per day (preferably early morning and  
93 late afternoon to best cover the 24-hour periods). Fish behavior, mortalities and visible  
94 abnormalities were also noted like jumping, restlessness, loss of equilibrium, clustering around  
95 aerators, inverted positions such as head up or down, loss of pigmentation, scale and fin erosion,  
96 exophthalmia and floating at surface or sinking were recorded and photographed.

97 At the end of experimental durations, a natural anesthetic, clove oil extracted from the distilled  
98 stems, leaves and flowers of the clove tree, *Syzygium aromaticum* was used at a dose of 50 µl/L  
99 (AVMA Guidelines, 2013) for the euthanasia of fish as an approach to follow humane endpoints.  
100 The animals were euthanized after 30 minutes of sampling from the water aquaria. The animals  
101 when reached the endpoint criteria were randomly sampled, dissected and analyzed for the  
102 histological changes in the fish organs. The kidneys, hearts, and muscles of the fish were  
103 removed carefully and preserved in 10% neutral-buffered formalin before being dehydrated in  
104 ascending degrees of alcohol and cleaned in xylene. Using a Euromex Holland microtome, the  
105 preserved tissues were soaked in paraffin wax and sliced into 4-6m thick pieces. The Harris  
106 Hematoxylin and Eosin technique was used to stain the sections (25). Then these sections were  
107 viewed under a microscope and images were captured by using a microscopic camera. At last,  
108 the sections produced from the controlled fish were compared. Figure 2 depicts the overall  
109 experiment.

## 110 **Results and Discussion**

111 Present study was conducted to evaluate the toxic impact of industrial effluents of Sunder  
112 Industrial Estate. Physico-chemical analysis revealed that these effluents were highly toxic, not  
113 only to aquatic organisms but the entire web chain including human beings who are primary  
114 consumer of fish. Aquatic species have been deemed an outstanding and cost-effective model

115 system because of their ability to concentrate, store, and metabolize water-borne contaminants  
116 (26) for analyzing the carcinogenic, mutagenic and toxic potential of pollutants (27) and (28).  
117 Fish exposed to chemical pollutants had a variety of lesions in various organs (29). Muscle (30),  
118 kidney (11), and heart (31) are good organs to examine histologically to check how pollution  
119 affects them.

120 Analysis of physico-chemical parameters, temperature, pH, Free CO<sub>2</sub>, alkalinity as CaCO<sub>3</sub>,  
121 Total alkalinity, total hardness, chloride, electrical conductivity, total dissolved solids (TDS)  
122 and salinity of control and treated groups is presented in Table 1. The mean values of all water  
123 quality variables recorded during the present investigation revealed that they all were  
124 significantly higher than the stander values. Whereas highest fluctuations were recorded in TDS  
125 content and alkalinity as CaCO<sub>3</sub> of control and treated fish. TDS was recorded in leather  
126 industry as 4959.33±675.17 mgL<sup>-1</sup> that was significantly higher than that of control group with  
127 a mean value of 356.867±303.86 mgL<sup>-1</sup>. Effluents from leather industry showed complete  
128 absence of free CO<sub>2</sub>. The mean electrical conductivity EC (µScm<sup>-1</sup>) ranged from 5835±794.21  
129 to 1629±20.53. Highest values of EC were recorded in leather industry and lowest in chemical  
130 industry-I respectively.

131 As fish were divided in two groups: control (Group D1) and treated groups (Groups D2, D3 and  
132 D4) and control group was taken as reference group. Control fish exhibited normal behavior as  
133 compared to the abnormal behavior of fish exposed to sub-lethal doses (1/3rd, 1/5th and 1/10th  
134 concentration of LC<sub>50</sub>) of industrial effluents. Fish in reference groups showed an ideal and  
135 normal physical appearance and behavior. No skin damage and scales loss was observed. Fish  
136 maintained its normal swimming position and opercular movement during the entire study  
137 period. While in treated group, a remarkable change in behavior was observed. Fish spent most

138 of the time at the bottom with gross pathologies like exophthalmia due to outward bulging of  
139 eyes, bleeding, hemorrhages and loss of vision. Red spots were observed around the gills.  
140 Reduced swimming activity and darting was also noticed in treated group fish. Fish was lethargic  
141 after exposure to industrial effluents. Inflammation, swelling, clogging of eyes, exophthalmia  
142 and excessive mucus secretion were observed in fish exposed to sub-lethal levels (1/3rd, 1/5th  
143 and 1/10th concentration of LC<sub>50</sub> of industrial effluents collected from all the sampling stations  
144 (Figure 2.1 A-F).

145 In test organisms, industrial effluents produce severe histological damage in the gill, kidney,  
146 liver, and gut. Furthermore, (32) revealed that malfunctions in fish general health conditions  
147 owing to direct discharge of effluents into water channels has an effect on fish general health. In  
148 the current investigation, histological changes in normal organs subjected to various  
149 concentrations of LC<sub>50</sub> of industrial effluents from the Sunder Industrial Estate are depicted in  
150 Figures 3-5, indicating mild to severe abnormalities, i.e. odema, hemorrhage, inflammation,  
151 atrophy, leukocytes infiltration, glomerular variations as well as alteration in proximal tubules,  
152 hyperplasia and tumor.

153 Under both short and long term conditions, the heart of treated fish showed substantial  
154 alterations when compared to control fish, indicating that cardiac tissue is not resistant to this  
155 exposure (Table#2). The heart of an untreated *O. niloticus* was comprised of a mass of properly  
156 arranged cardiomyocytes. Furthermore, no evidence of necrosis could be found (Figure 3-  
157 A&B).

158 Affected myocytes in the treated groups showed symptoms of degeneration, including  
159 condensation, focal area of necrosis, vacuolar degeneration and loss of muscle striation, (Figure  
160 3-G). Pyknosis or karyolysis was also occurring in a number of cells. Necrotic cells were found

161 in the presence of inflammatory infiltrates (Figure 3-F&I). Ventricular lesions were the most  
162 prevalent, with mononuclear cells infiltrating both the spongy and compact layers (Figure 3-E).

163 Hemorrhage, atrophy, pericardium injury, myocarditis, necrosis, and other histopathological  
164 changes were observed in treated fish. . Maurya et al., 2019 (6) found significant alterations in  
165 heart tissue after exposure to industrial effluents, which is consistent with current study. An  
166 extensive myocarditis was a constant observation in all treatment groups; especially in group B  
167 (Figure 3-J) as compared to control group A, indicating inflammation. Inflammatory cells were  
168 seen in and around myocytes in a diffused or focused manner, with the compact layer showing  
169 the most inflammatory cells. In group B and C (Figure 3-D&G) respectively, leukocyte  
170 infiltrates were limited to the interface between the spongy and compact layers.

171 Cellular infiltration was broad and substantial in chronic exposure group D, with a significant  
172 number of necrotic myocytes. All of the treated groups showed hyperplasia, or hypergenesis,  
173 which is a rise in the quantity of organic tissue caused by cell proliferation. In chronic group D,  
174 there was a lot of hyperplasia (Figure 3-K). All treated groups had mild to moderate aneurysms,  
175 with stage I and II, in groups B, C, and D, respectively. In the myocardium of the treated groups,  
176 focal area of necrosis and hyperplasia were at stages II and III on the histological alteration index  
177 (Table 3). In addition, histological changes in the pericardium of the heart were documented i.e.  
178 pericardium bending, lifting and damaging as compared to control.

179 Essien and Chinwe (33), observed similar results after exposing *Oreochromis niloticus* to  
180 effluents. After 96 hours of sublethal exposure to malathion, Mager and Dube (34) found  
181 structural changes in the heart muscle of *Channa punctatus*, including atrophy and congestion.  
182 After toxicant exposure, Das and Mukherjee (35) found significant pericardial thickening and  
183 leucocyte infiltration in the *labeo rohita*.



184 In all treated groups, however, kidney tissues of *O. niloticus* revealed expanded bowmen space  
185 and dilated glomerulus (Figure 4-C, H, and N). Group B kidney tissues displayed necrotic  
186 proximal tubules, damaged renal/glomerular tubules, and hemorrhage after exposure to 1/3rd of  
187 LC50. The kidney of *O. niloticus* in the control group, on the other hand, had a normal  
188 histological features, with roughly spherical glomeruli and appropriate bowman space (Figure.4-  
189 A). Normal structure was seen in the lumen of distal tubules and the brush border of proximal  
190 tubules and (Figure 4-B).

191 As demonstrated in (Table 4), frequency and prevalence percentage of kidney lesions increased  
192 with an increase in exposure length to 6 months compared to 3 and 15 days. Damage to the  
193 nephronic and tubular levels of the kidney has been discovered in a recent study (Figure 4).  
194 Hemorrhage and vacuolization (stage I damage) in group B, renal and tubular degeneration,  
195 (stage II damage) in group C, and proximal tubular necrosis (stage III damage) in group D were  
196 all observed. Corpuscles showed obvious damage, including glomerulus shrinkage, glomerular  
197 structural alteration had same degree of damage, and increase in glomerulus space (stage I, II and  
198 III damage) showed duration dependent alteration in all treated groups (Table 5). Other  
199 histological abnormalities associated with blood cell infiltration were also seen in the current  
200 investigation. In fish, renal tubule necrosis impacts metabolic activity and promotes metabolic  
201 disorders (36).

202 The degenerative process contributes to tissue necrosis with chronic exposure. So in group D, the  
203 maximum prevalence of histopathological alteration of all three categories (stages I, II, and III)  
204 was seen. When compared to changes observed after 3 and 15 days, the damage was much more  
205 severe. The tubular epithelium showed necrosis in renal tubules with focal areas of necrosis  
206 (Figure 4-N) with deshaped glomerulus (structural alteration) (Figure 4-L&M). Degeneration,

207 vacuolization, and disordered capillaries in the glomerulus were detected in all treatment groups  
208 (Figure 4-D, E, G, and N).

209 In the exposed fish, structural damage varied from mild (3 days), moderate (15 days) and severe  
210 (6 months). The identified degree of tissue alteration values is consistent with previous studies  
211 that treated *Labeo rohita* with chronic wastewater exposure, as reported by (11). Shrinkage,  
212 destruction of tubular epithelium, vacuolization, and glomerulus injury are some of the other  
213 histological abnormalities seen in the kidney. Navaraj and Yasmin (37) found similar results in  
214 *Oreochromis mossambicus* subjected to tannery industry waste water and *Rasbora daniconius*  
215 exposed to sub-lethal concentrations of industrial effluents (38).

216 Histopathology of transversely sectioned muscle tissues of *O. niloticus* exposed to varying  
217 concentrations of LC<sub>50</sub> revealed different histological alterations in duration dependent manner,  
218 including oedema (Figure 5- D&G), muscle fiber necrosis (Figure 5-H) and inflammation  
219 (Figure 5-K), enlarging lesions in muscular tissue's epidermis (Figure 5 J&K), and many others  
220 (Table 6). Muscle fibers with a wispy coating of areolar endomysial connective tissue that  
221 encased muscle fibers were seen in control tilapia tissues (Figure 5-A). Many thick and thin  
222 alternating myofilaments were observed in myofibrils with a diameter of 1 micrometer (Figure 5-  
223 B).

224 The tissue sections of fish subjected to a chronic dosage of effluents revealed significant  
225 alterations. Disintegration (Figure 5-N) in muscle bundles along with focal areas of necrosis  
226 were among the pathological findings (Figure 5-K). In addition, group D had moderate vacuolar  
227 degeneration in muscle bundles, but group B had significant vacuolar degeneration and muscle  
228 bundle atrophy (Figure 5-L). There was oedema between muscle bundles in group D, as well as  
229 muscle fiber breaking. The histopathology of the muscle of the treated fish revealed gradual

230 damage to the structure of the muscle when the effluents were applied for longer periods of time.  
231 As the effluent duration increased, Nagarajan and Suresh (39) reported comparable outcomes in  
232 the muscle tissue of the fish *Cirrhinus mrigala*.

233 The muscle layer that made up skeletal muscle in normal fish was the lateral muscle layer.  
234 Whereas cell fading was observed in the infected muscle of groups B and C (Figure 5-D&G),  
235 necrosis was observed in the infected muscle of group A. In addition, the damaged muscle  
236 generated by the 1/3rd and 1/5th doses of industrial effluents in groups B and C, which was  
237 characterized by muscular abnormalities, can be seen in (Figure 5-E&I). Inflammatory cell  
238 infiltration is a pathogenic reaction that occurred in all of the treatment groups.

239 Thickening and intermyo fibril spaces (Figure 5-M), necrosis (Figure 5-L), hemorrhage, and  
240 lesions with reduced compactness were detected after chronic exposure of effluents in group D.  
241 While sub-chronic concentrations of effluents caused pronounced intramuscular oedema and  
242 mild dystrophic changes in group C. Damaged myofibrils (Figure 5-G) and bundles ((figure 5-I)  
243 and formation of gap between muscle bundles were noted as significant changes, which  
244 eventually led to degeneration of muscular bundles along focal areas of necrosis, and atrophy  
245 (Figure 5-J).

246 Muscle tissue in the chronic exposure group D showed dystrophic alterations. The myoseptum,  
247 which separates each myotome, appears to have vanished from the muscle. In the muscle  
248 portion, there is also disintegrated epidermis. Intramuscular oedema is a common symptom, with  
249 the highest incidence in group D and the lowest in the other treated fish groups. Furthermore,  
250 chronic exposure resulted in the formation of tumor cells (Figure 5-M), as well as other serious  
251 changes. Histological alteration index (HAI) of muscle for group D showed highest alteration as  
252 compared to group B and C (Table 7).

253 Minor lesion, inclusion of bodies and necrosis, cellular degeneration and inflammation, were  
254 detected in the muscular tissue of the fish *O. niloticus* by Oluwatoyin (40). Similarly, Nagarajan  
255 (30) found that when effluent concentrations increased, muscle tissue began to deteriorate. Many  
256 researchers have investigated the effect of various contaminants on the muscles of fish have  
257 identified histological abnormalities in the muscles of the analyzed fish (41); (42) and (36).

258 Pollution is one of the most damaging human influences on the aquatic environment, resulting in  
259 chronic stress conditions that harm aquatic species. Many researchers have studied the effects of  
260 various pollutants on various fish organs, and the current findings are consistent with their  
261 findings (33) and (43). The presence of histological alteration in several organs of fish has been  
262 analyzed, revealing that these effluents cause serious damage to muscle, kidney, and heart. The  
263 histological studies are useful tool for determining the effects of numerous anthropogenic  
264 poisons on living organisms. In a biological system, histopathological biomarkers reflect the  
265 population's overall health (44).

266 The current investigation found that the water quality in Sunder Industrial Estate had  
267 deteriorated, with multiple physicochemical characteristics exceeding the standard discharge  
268 limits. The lesions found in histological examinations revealed cellular and organ damage, as  
269 well as confirming *Oreochromis niloticus* sensitivity to industrial effluent. The fish's histological  
270 modifications show how they deal with the stress of inadequate water quality. Present study  
271 revealed that *Oreochromis niloticus* should be deployed as sentinels in water quality monitoring  
272 programs.

## 273 **Conclusion**

274 Histopathological data revealed that a composite of industrial effluents was capable of altering  
275 the gross structure of fish organs, resulting in increasing degrees of tissue damage in correlation  
276 to the effluent dose duration. In addition, important physico-chemical parameters of industrial  
277 waste water were also recorded which were beyond the stander range.

## 278 **Acknowledgment**

279 I am heartily thankful to my supervisor for her fruitful guidelines for this research and Higher  
280 Education Commission Pakistan too. This research was funded by Higher Education  
281 Commission Pakistan under the project#7423/KPK/NRPU.

## References

1. Yadav KK, Gupta N, Kumar V, Choudhary P, Khan SA. GIS-based evaluation of groundwater geochemistry and statistical determination of the fate of contaminants in shallow aquifers from different functional areas of Agra city, India: levels and spatial distributions. *RSC advances*. 2018;8(29):15876-89.
2. Gupta N, Yadav KK, Kumar V. A review on current status of municipal solid waste management in India. *Journal of Environmental Sciences*. 2015;37:206-17.
3. Berehanu B, Lemma B, Tekle-Giorgis Y. Chemical composition of industrial effluents and their effect on the survival of fish and eutrophication of lake Hawassa, Southern Ethiopia. *Journal of Environmental Protection*. 2015;6(08):792.
4. Talouizte H, Merzouki M, Benlemlih M, Bendriss Amraoui M. Chemical Characterization of Specific Micropollutants from Textile Industry Effluents in Fez City, Morocco. *Journal of Chemistry*. 2020;2020.
5. Dutta J, Ahmad A, Singh J. Study of industrial effluents induced genotoxicity on *Allium cepa* L. *Caryologia*. 2018;71(2):139-45.
6. Kumar Maurya P, Malik DS, Kumar Yadav K, Gupta N, Kumar S. Haematological and histological changes in fish *Heteropneustes fossilis* exposed to pesticides from industrial waste water. *Human and Ecological Risk Assessment: An International Journal*. 2019;25(5):1251-78.
7. Naemi A, Jamili S, Shabanipour N, Mashinchian A, Shariati Feizabadi S. Histopathological changes of gill, liver and kidney in Caspian kutum exposed to Linear Alkylbenzene Sulfonate. 2013.
8. Javed M, Usmani N. Accumulation of heavy metals and human health risk assessment via the consumption of freshwater fish *Mastacembelus armatus* inhabiting, thermal power plant effluent loaded canal. *SpringerPlus*. 2016;5(1):776.
9. Kaoud H, El-Dahshan A. Bioaccumulation and histopathological alterations of the heavy metals in *Oreochromis niloticus* fish. *Nature and science*. 2010;8(4):147-56.
10. Abiona OO, Anifowose AJ, Awojide SH, Adebisi OC, Adesina BT, Ipinmoroti MO. Histopathological biomarking changes in the internal organs of *Tilapia* (*Oreochromis niloticus*) and catfish (*Clarias gariepinus*) exposed to heavy metals contamination from Dandaru pond, Ibadan, Nigeria. *Journal of Taibah University for Science*. 2019;13(1):903-11.

11. Kaur R, Dua A. Induction of histopathological lesions in renal tissue of the fish *Labeo rohita* upon exposure to municipal wastewater of Tung Dhab Drain, Amritsar, India. *Turkish Journal of Zoology*. 2016;40(5):645-54.
12. Abiona O, Awojide O, Odesanmi S, Ajayi O. Assessment of heavy and trace metal contents of internal organs of tilapia (*Oreochromis niloticus*) and catfish (*Clarias gariepinus*) obtained from Dandaru fish pond, Ibadan Oyo State. 2018;10.
13. Sayer J, Cassman KG. Agricultural innovation to protect the environment. *Proceedings of the National Academy of Sciences*. 2013;110(21):8345-8.
14. Mahboob S, Niazi F, AlGhanim K, Sultana S, Al-Misned F, Ahmed Z. Health risks associated with pesticide residues in water, sediments and the muscle tissues of *Catla catla* at Head Balloki on the River Ravi. *Environmental Monitoring and Assessment*. 2015;187(3):81.
15. Al-Ghanim KA, Mahboob S, Seemab S, Sultana S, Sultana T, Al-Misned F, et al. Monitoring of trace metals in tissues of *Wallago attu* (lanchi) from the Indus River as an indicator of environmental pollution. *Saudi Journal of Biological Sciences*. 2016;23(1):72-8.
16. Nikalje S, Muley D, Angadi S. Histopathological changes in gills of a freshwater major carp *Labeo rohita* after acute and chronic exposure to textile mill effluent (tme). *International Journal of Environmental Sciences*. 2012;3(1):108-18.
17. Muñoz L, Weber P, Dressler V, Baldisserotto B, Vigliano FA. Histopathological biomarkers in juvenile silver catfish (*Rhamdia quelen*) exposed to a sublethal lead concentration. *Ecotoxicology and Environmental Safety*. 2015;113:241-7.
18. Kaur R, Dua A. 96 h LC50, behavioural alterations and histopathological effects due to wastewater toxicity in a freshwater fish *Channa punctatus*. *Environmental Science and Pollution Research*. 2015;22(7):5100-10.
19. Zaghoul KH, Mohamed HA, Abdullatef AM, Khalil MW. Genotoxic and Histopathological Effects of Water Pollution on *Clarias gariepinus* Fish at Fayoum Governorate, Egypt. *Natural Resources*. 2020;11(11):499-519.
20. Aich A, Goswami AR, Roy US, Mukhopadhyay SK. Ecotoxicological Assessment of Tannery Effluent Using Guppy Fish (*Poecilia reticulata*) as an Experimental Model: A Biomarker Study. *Journal of Toxicology and Environmental Health, Part A*. 2015;78(4):278-86.

21. Tayyaba Sultana AR, and Salma Sultana. Fish organs histopathology exposed to domestic wastes and industrial effluents revealing the toxic effects in selected fish species. *Journal of Clinical & Experimental Pharmacology*. December 2017.
22. Olubukola AA, Victor CA. Altered reproduction in *Clarias gariepinus* exposed to industrial effluents. *American Journal of Agricultural and Biological Sciences*. 2012;7(1):61-70.
23. Baird RB. Standard methods for the examination of water and wastewater, 23rd. Water Environment Federation, American Public Health Association, American ...; 2017.
24. Reish DL, Oshida PS. Manual of methods in aquatic environment research: Food & Agriculture Org.; 1987.
25. Bernet D, Schmidt H, Meier W, Burkhardt-Holm P, Wahli T. Histopathology in fish: proposal for a protocol to assess aquatic pollution. *Journal of Fish Diseases*. 1999;22(1):25-34.
26. Osman AGM, Wuertz S, Mekkawy IA, Exner H-J, Kirschbaum F. Lead induced malformations in embryos of the African catfish *Clarias gariepinus* (Burchell, 1822). *Environmental Toxicology*. 2007;22(4):375-89.
27. Fagbohun AF, Ola-Davies OE, Emikpe BO, Obagbemi O, Adeyemo OK. Chronic Exposure to No-Effect Concentration of Diazinon Induced Histological Lesions in Organs of *Clarias gariepinus*. *Agricultural Sciences*. 2020;11(7):627-37.
28. Younis NA, Laban SE, Al-Mokaddem AK, Attia MM. Immunological status and histopathological appraisal of farmed *Oreochromis niloticus* exposed to parasitic infections and heavy metal toxicity. *Aquaculture International*. 2020;28(6):2247-62.
29. Zulkipli SZ, Liew HJ, Ando M, Lim LS, Wang M, Sung YY, et al. A review of mercury pathological effects on organs specific of fishes. *Environmental Pollutants and Bioavailability*. 2021;33(1):76-87.
30. Nagarajan K. Histopathological changes in the muscle tissue of the fish *Clarias batrachus* exposed to untreated and treated sago effluent. *Advances in Bioscience and Bioengineering*. 2013;1(2).
31. Ada F. Effects of *Gmelina aborea* fruit juice on histopathology of cardiac muscle, gills, liver and skin of *Clarias gariepinus* juveniles. *J Aquac Mar Biol*. 2018;7(4):233-9.
32. Borgia V, Thatheyus A, Murugesan A. Impact of electroplating industry effluent on the electrophoretic protein pattern of serum in the freshwater fish *Cyprinus carpio*. *Indian Journal of Biochemistry and Biophysics (IJBB)*. 2019;56(6):460-5.



33. Essien EB, Chinwe BWAN. Assessment of the toxic effect of mixed effluents from trans-amadi industrial layout on Tilapia (*Oreochromis niloticus*) in Okrika River, Port Harcourt, Rivers State, Nigeria. *Assessment*. 2015;5(10).
34. Magar R, Dube K. Effect of sub lethal concentration of malathion on metabolic profiles and histological studies in heart tissue of *Channa punctatus*. *IOSR Journal of Environmental Science, Toxicology and Food Technology (IOSR-JESTFT)*. 2013;2(6):8-12.
35. Das BK, Mukherjee SC. A histopathological study of carp (*Labeo rohita*) exposed to hexachlorocyclohexane. *Veterinarski Arhiv*. 2000;70(4):169-80.
36. Mohamed FA. Histopathological studies on Tilapia zillii and Solea vulgaris from Lake Qarun, Egypt. *World Journal of Fish and Marine Sciences*. 2009;1(1):29-39.
37. Navaraj P, Yasmin J. Toxicological evaluation of tannery industry waste water on *Oreochromis mossambicus*. *African Journal of Environmental Science and Technology*. 2012;6(9):331-6.
38. Pathan T. Histopathological changes in liver and kidney of freshwater fish, *Rasbora daniconius* exposed to sub-lethal concentration paper mill effluent. *Journal of Experimental Zoology, India*. 2020;23(1):41-6.
39. Nagarajan K, Suresh K. Observations on the changes in eye and muscle tissues of *Cirrhinus mrigala* exposed to sublethal concentrations of treated effluent. *J Indus Polln Cont*. 2005;21(1):109-14.
40. Oluwatoyin AS. Histopathology of Nile Tilapia (*Oreochromis niloticus*) juveniles exposed to aqueous and ethanolic extracts of *Ipomoea aquatica* leaf. *International Journal of Fisheries and Aquaculture*. 2011;3(14):244-57.
41. Ashraf S, Naveed M, Afzal M, Ashraf S, Ahmad SR, Rehman K, et al. Evaluation of Toxicity on *Ctenopharyngodon idella* Due to Tannery Effluent Remediated by Constructed Wetland Technology. *Processes*. 2020;8(5):612.
42. Shakir HA, Qazi JI, Chaudhry AS. Examining muscles of *Cirrhinus mrigala* for biochemical parameters as a bio-indicator of water pollution by municipal and industrial effluents into River Ravi, Pakistan. *International Aquatic Research*. 2014;6(4):221-8.
43. Tayel S, Ahmed N, EL-Hossiny M. Impact of diffused pollution on histological and hematological properties of *Mugil cephalus* and *Mugil capito* collected from lake Manzalah, Egypt. *Int J Environ Sci Engineer*. 2014;5:51-67.

44. Khoshnood Z, Mokhlesi A, Khoshnood R. Bioaccumulation of some heavy metals and histopathological alterations in liver of *Euryglossa orientalis* and *Psettodes erumei* along North Coast of the Persian Gulf. African journal of biotechnology. 2010;9(41):6966-72.

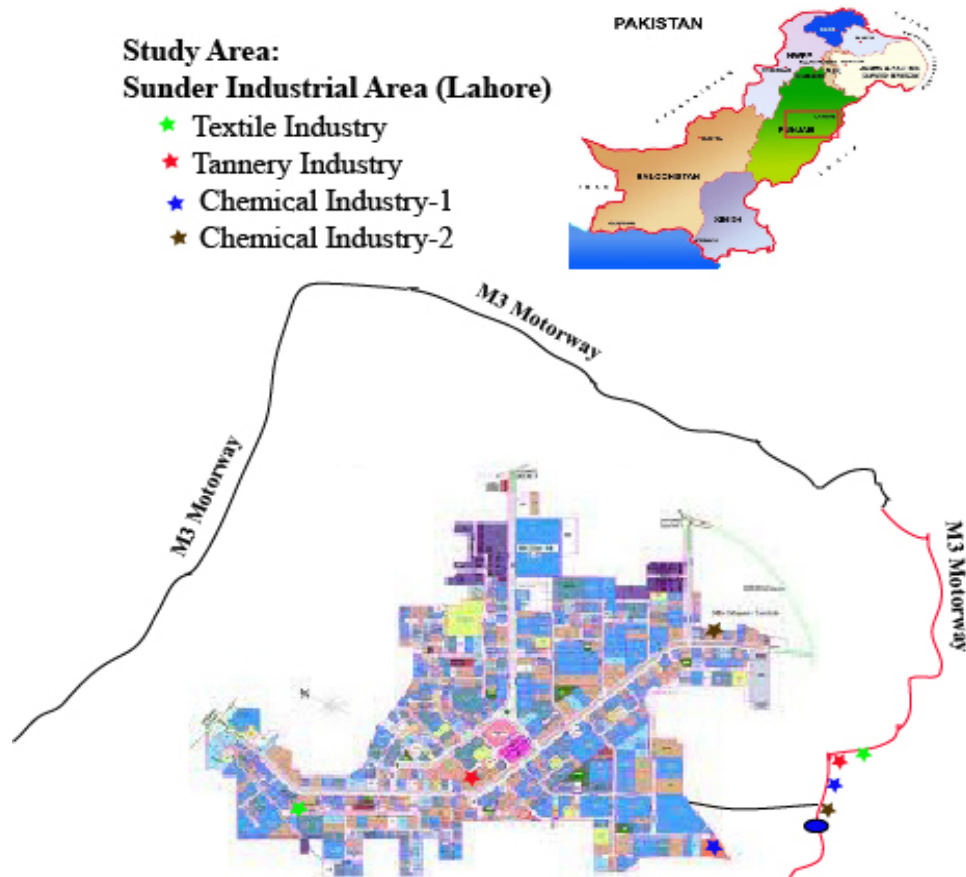

Figure 1: Geographical map of study area

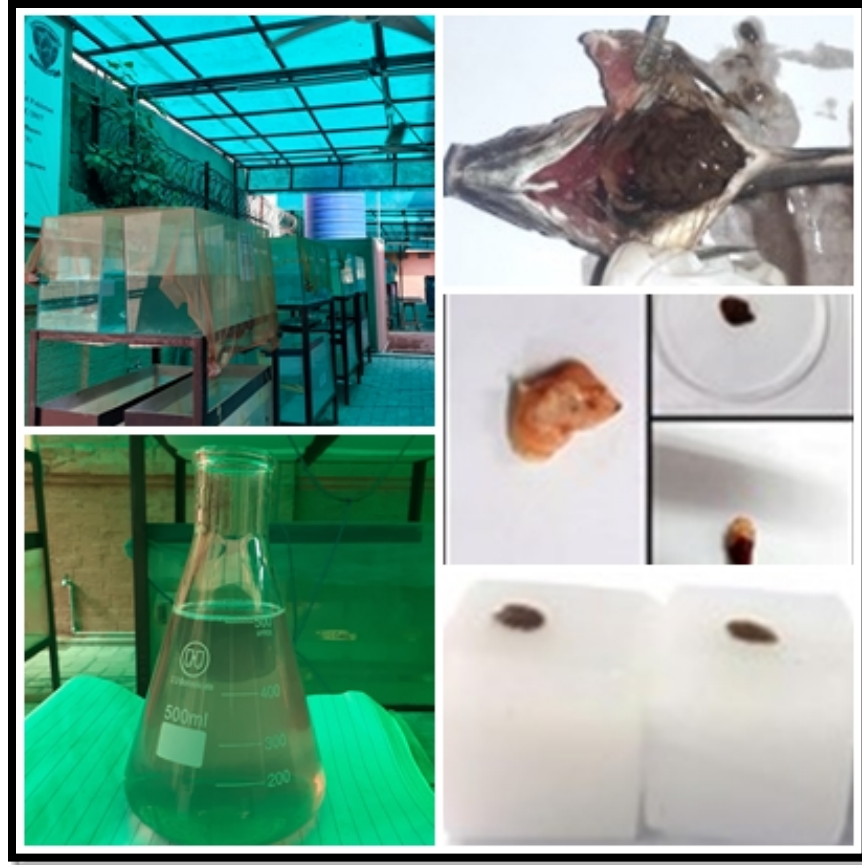

Figure 2: Overall representation of experiment

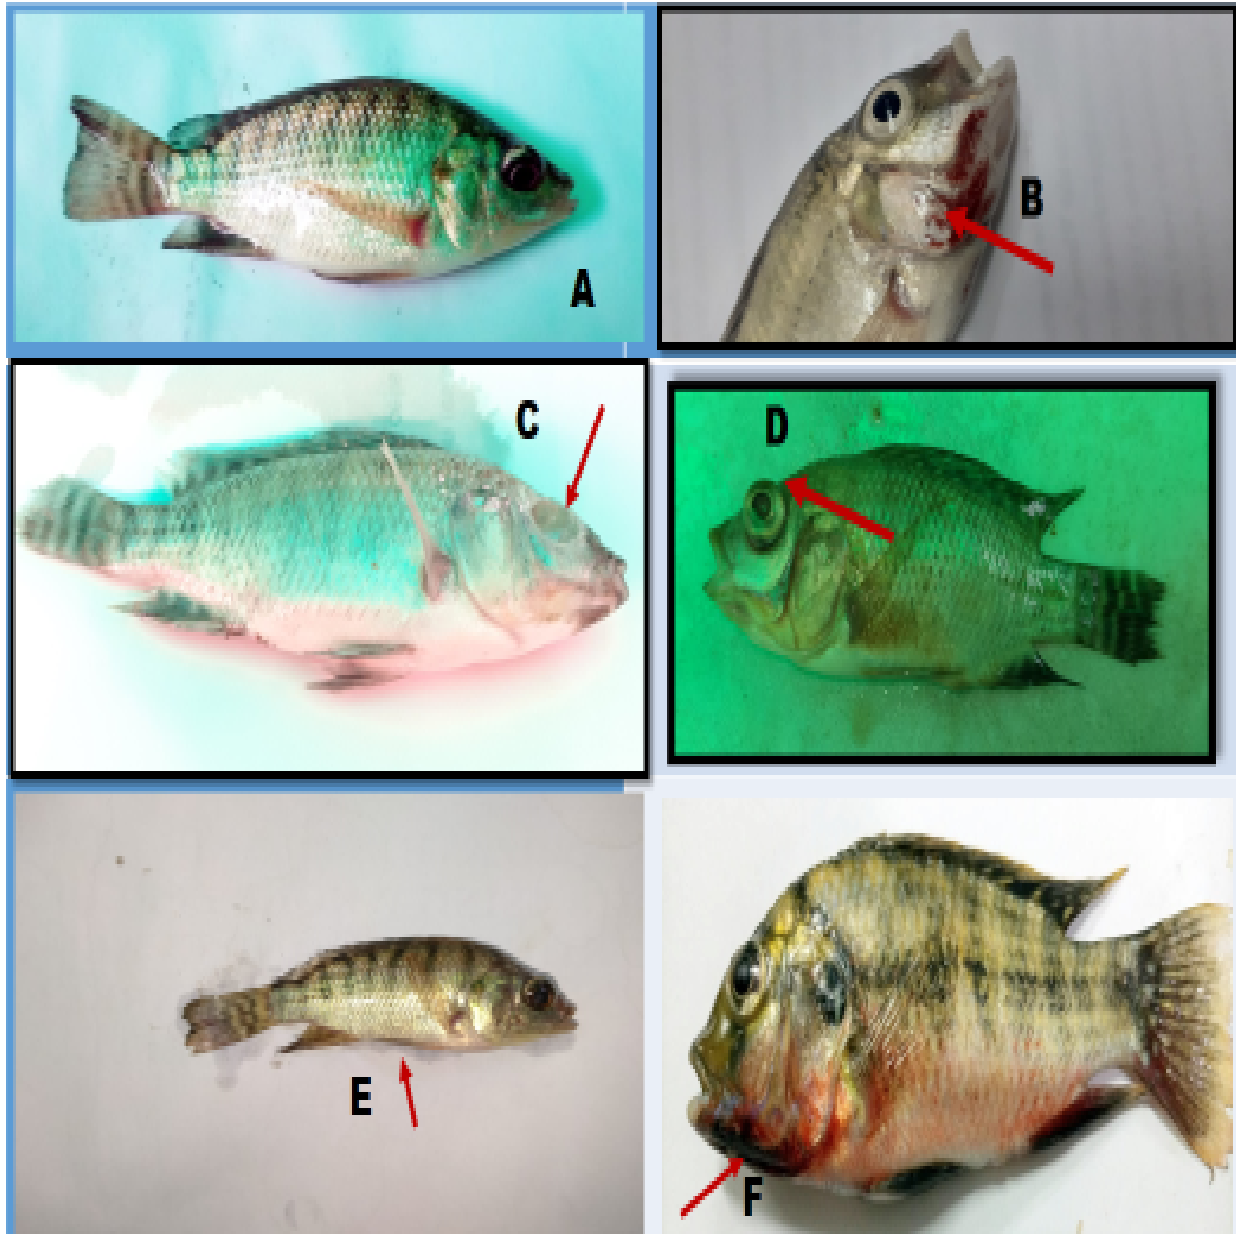

Figure 2.1. (A-F). Normal features of *Oreochromis niloticus* (A); Inflammation and swelling (B); Clogging of eye and loss of vision (C); Exophthalmia (D); skeletal deformity and curvature (E) and Hemorrhage (F) due to sub-lethal industrial effluent exposure.

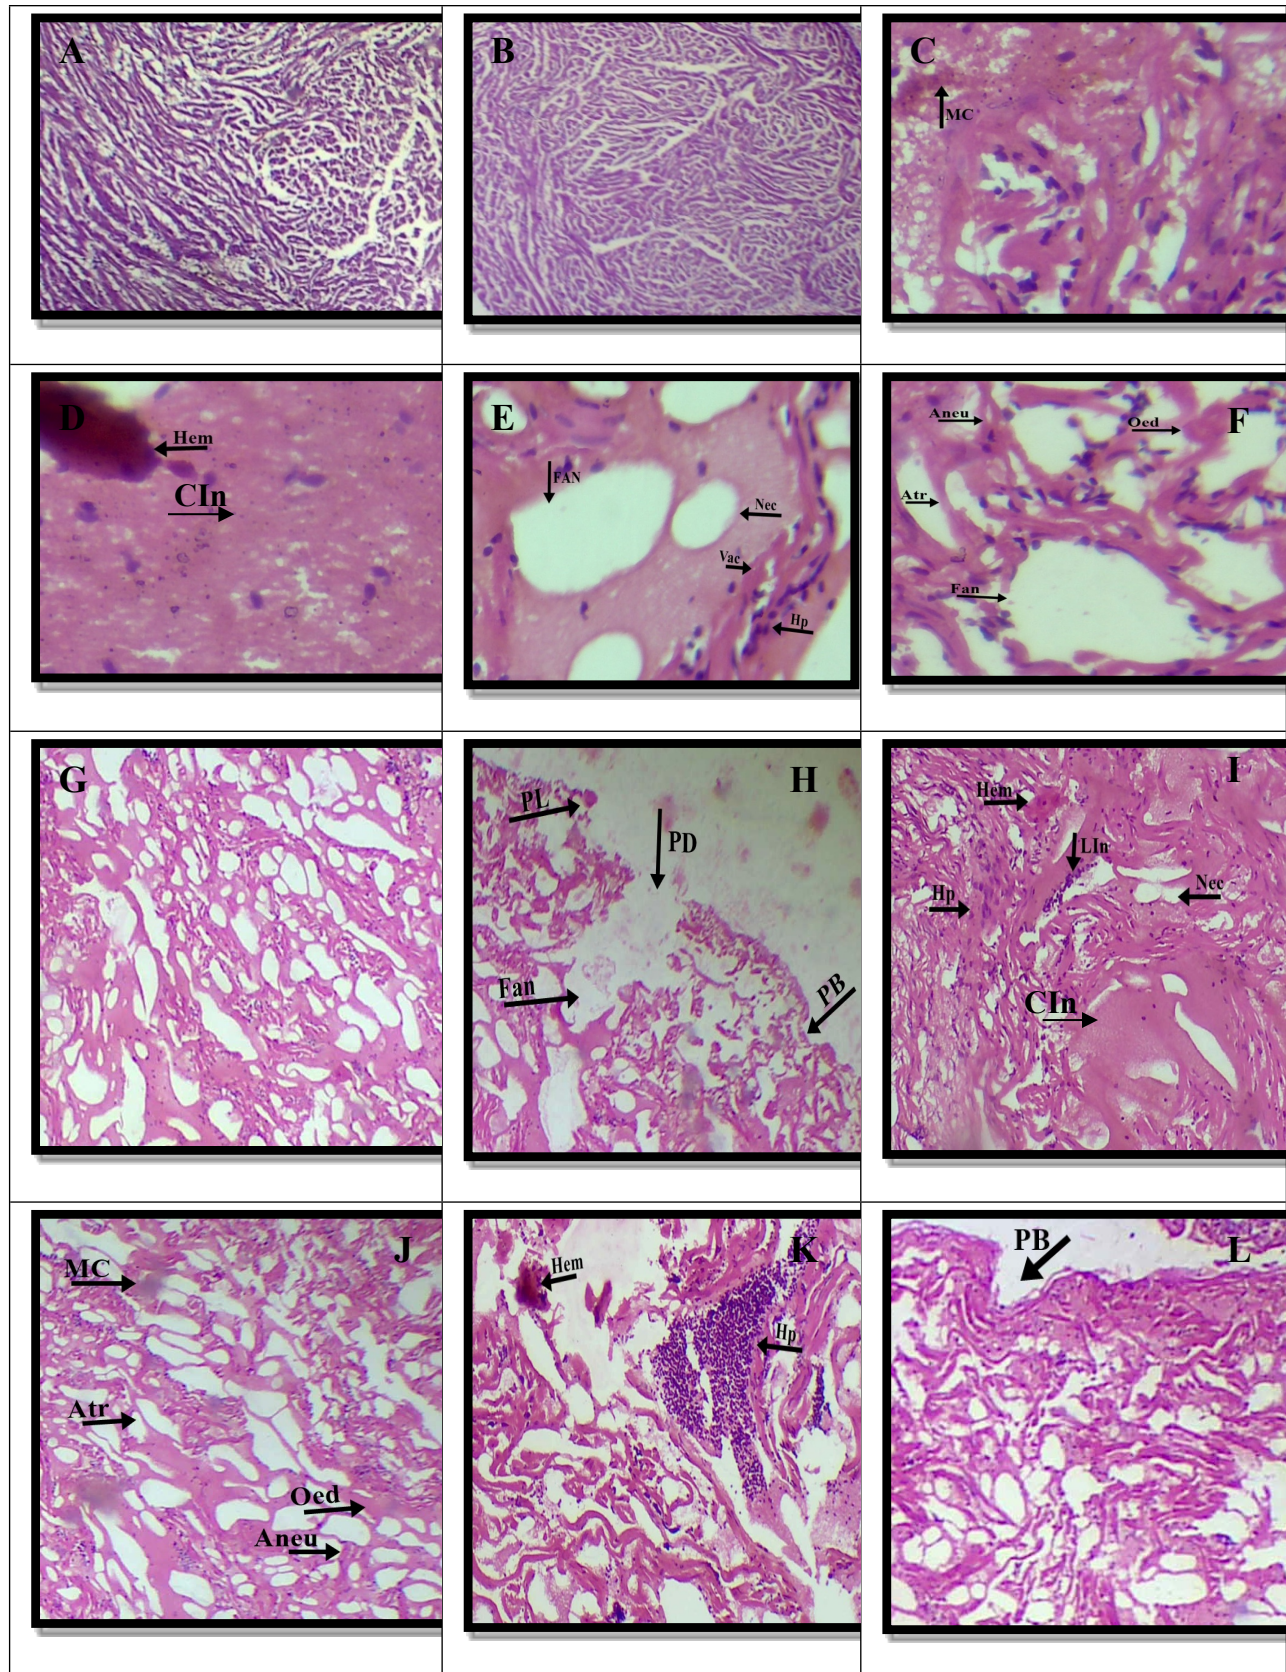

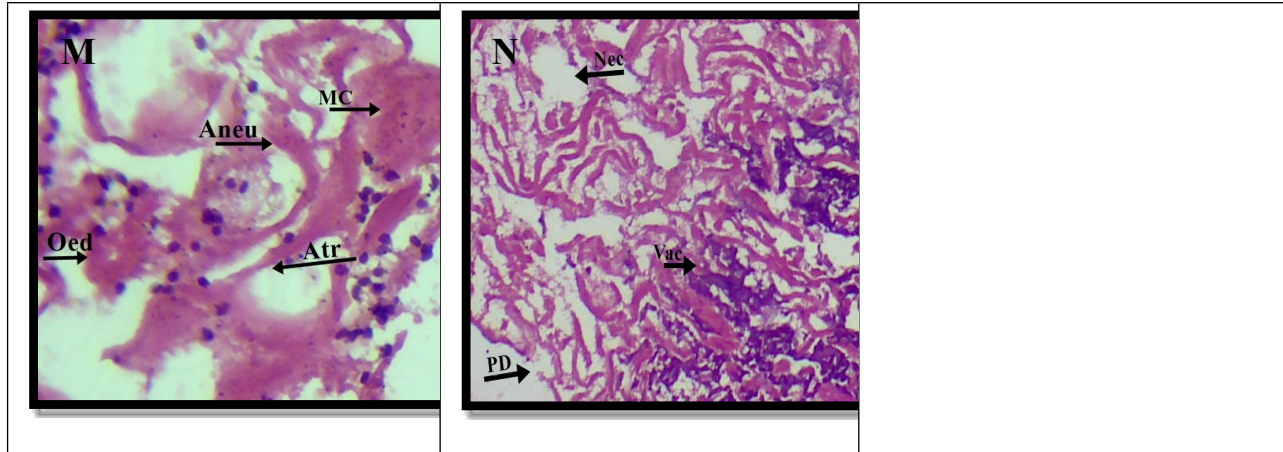

**Figure 3: Histopathological alteration of transversely paraffin sectioned of Heart of *Oreochromis niloticus* electron micrographs (10×&40×) (H&E). (A&B) Control, (C-F) 1/3<sup>rd</sup> of LC<sub>50</sub>, (G-J) 1/5<sup>th</sup> of LC<sub>50</sub>, (K-N) 1/10<sup>th</sup> of LC<sub>50</sub>. Normal architecture of muscle tissues were observed in the control fishes. Abbreviations are as= Hem=Hemorrhage, FAN= Focal area of necrosis, Oed=Oedema, PB=Pericardium bending, PL=Pericardium lifting, Aneu=Aneurysm, Atr=Atrophy, PD=Pericardium Damage, Vac=Vacuolar degeneration, Nec=Necrosis, HP=Hyperplasia, LI=Leucocytes Infiltration and MC=Myocarditis**

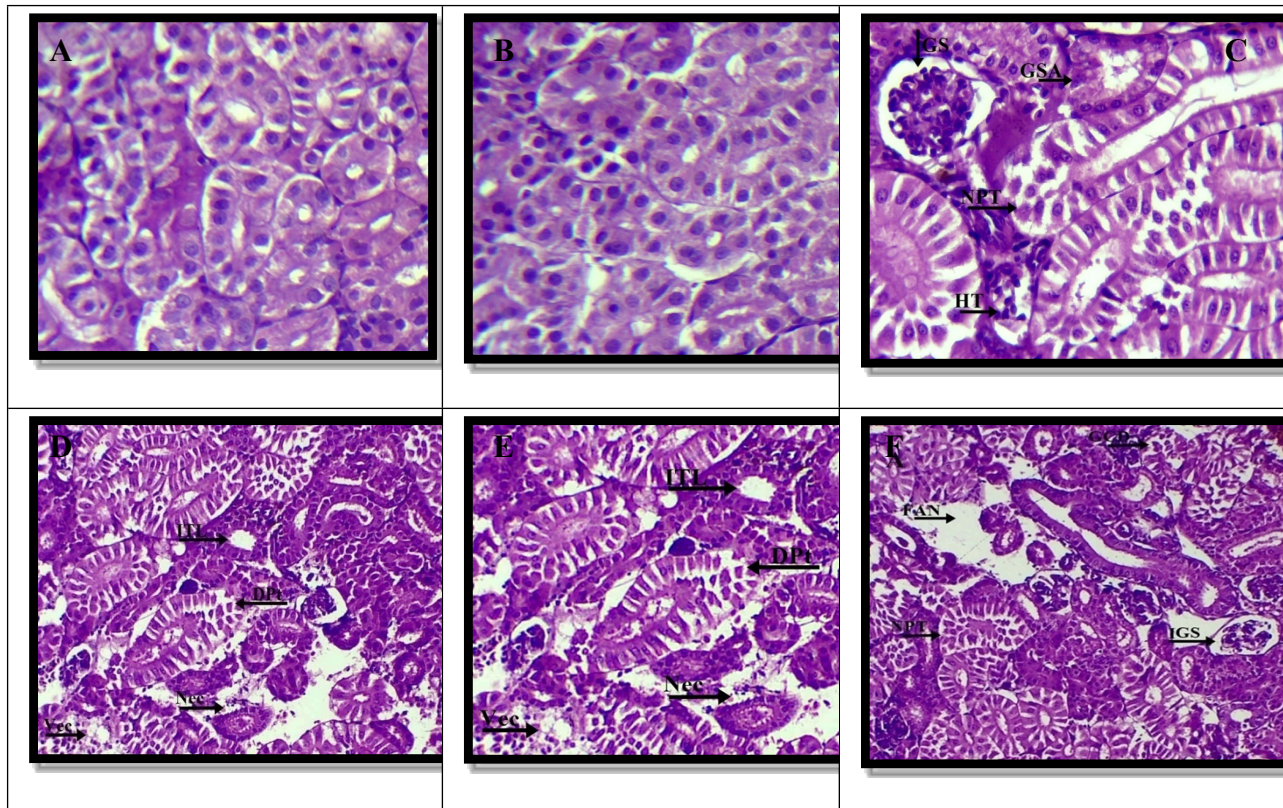

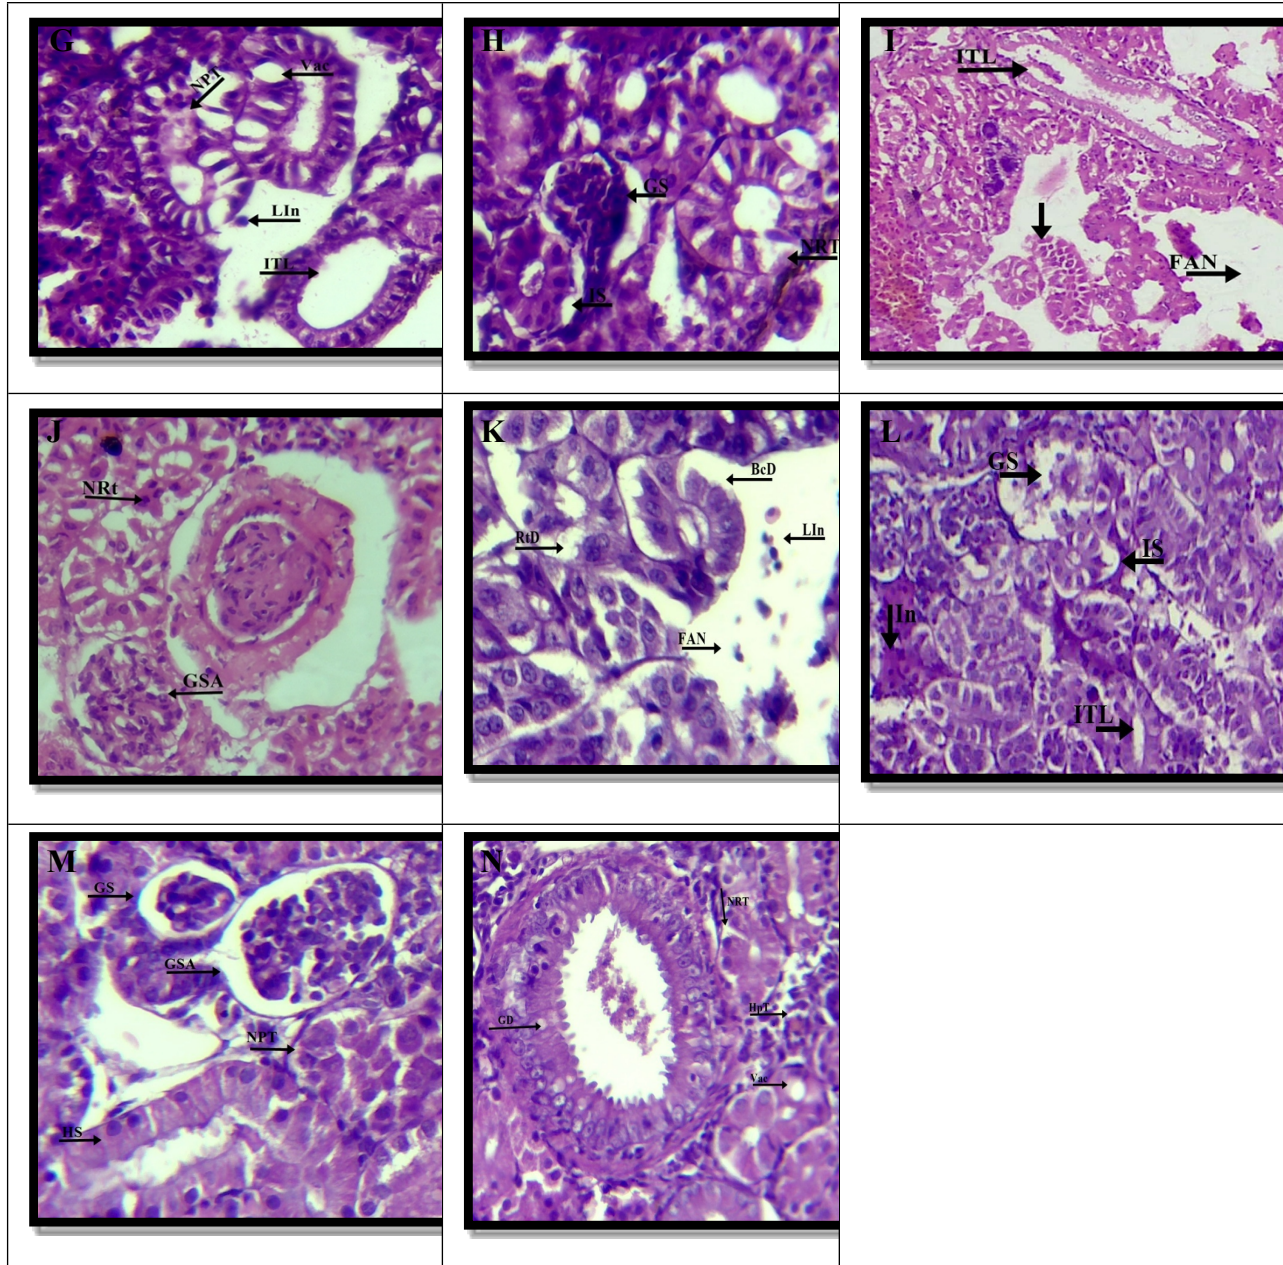

**Figure 4: Histopathological alteration of transversely paraffin sectioned of Kidney of *Oreochromis niloticus* electron micrographs (10×&40×) (H&E). (A&B) Control, (C-F) 1/3<sup>rd</sup> of LC<sub>50</sub>, (G-J) 1/5<sup>th</sup> of LC<sub>50</sub>, (K-N) 1/10<sup>th</sup> of LC<sub>50</sub>. Normal structure of kidney tissues was observed in the control fishes. Abbreviations are as= Hem=Hemorrhage, FAN= Focal area of necrosis, GD= Glomerulus arteries degeneration, NPT= Necrotic proximal tubule, IGS=Increase Glomerulus space, GSA=Glomerulus structural alteration, BcD= Bowman's capsule disintegration, GS=Glomerulus shrinkage, NRT=Necrotic renal tubule, HS=Hydropic swelling, ITL=Increase tubular lumen, Vac=vacuolar degeneration, HpT=Hematopoietic tissue Necrosis, RtD=Renal tubule degeneration and Lin=Leukocyte infiltration**

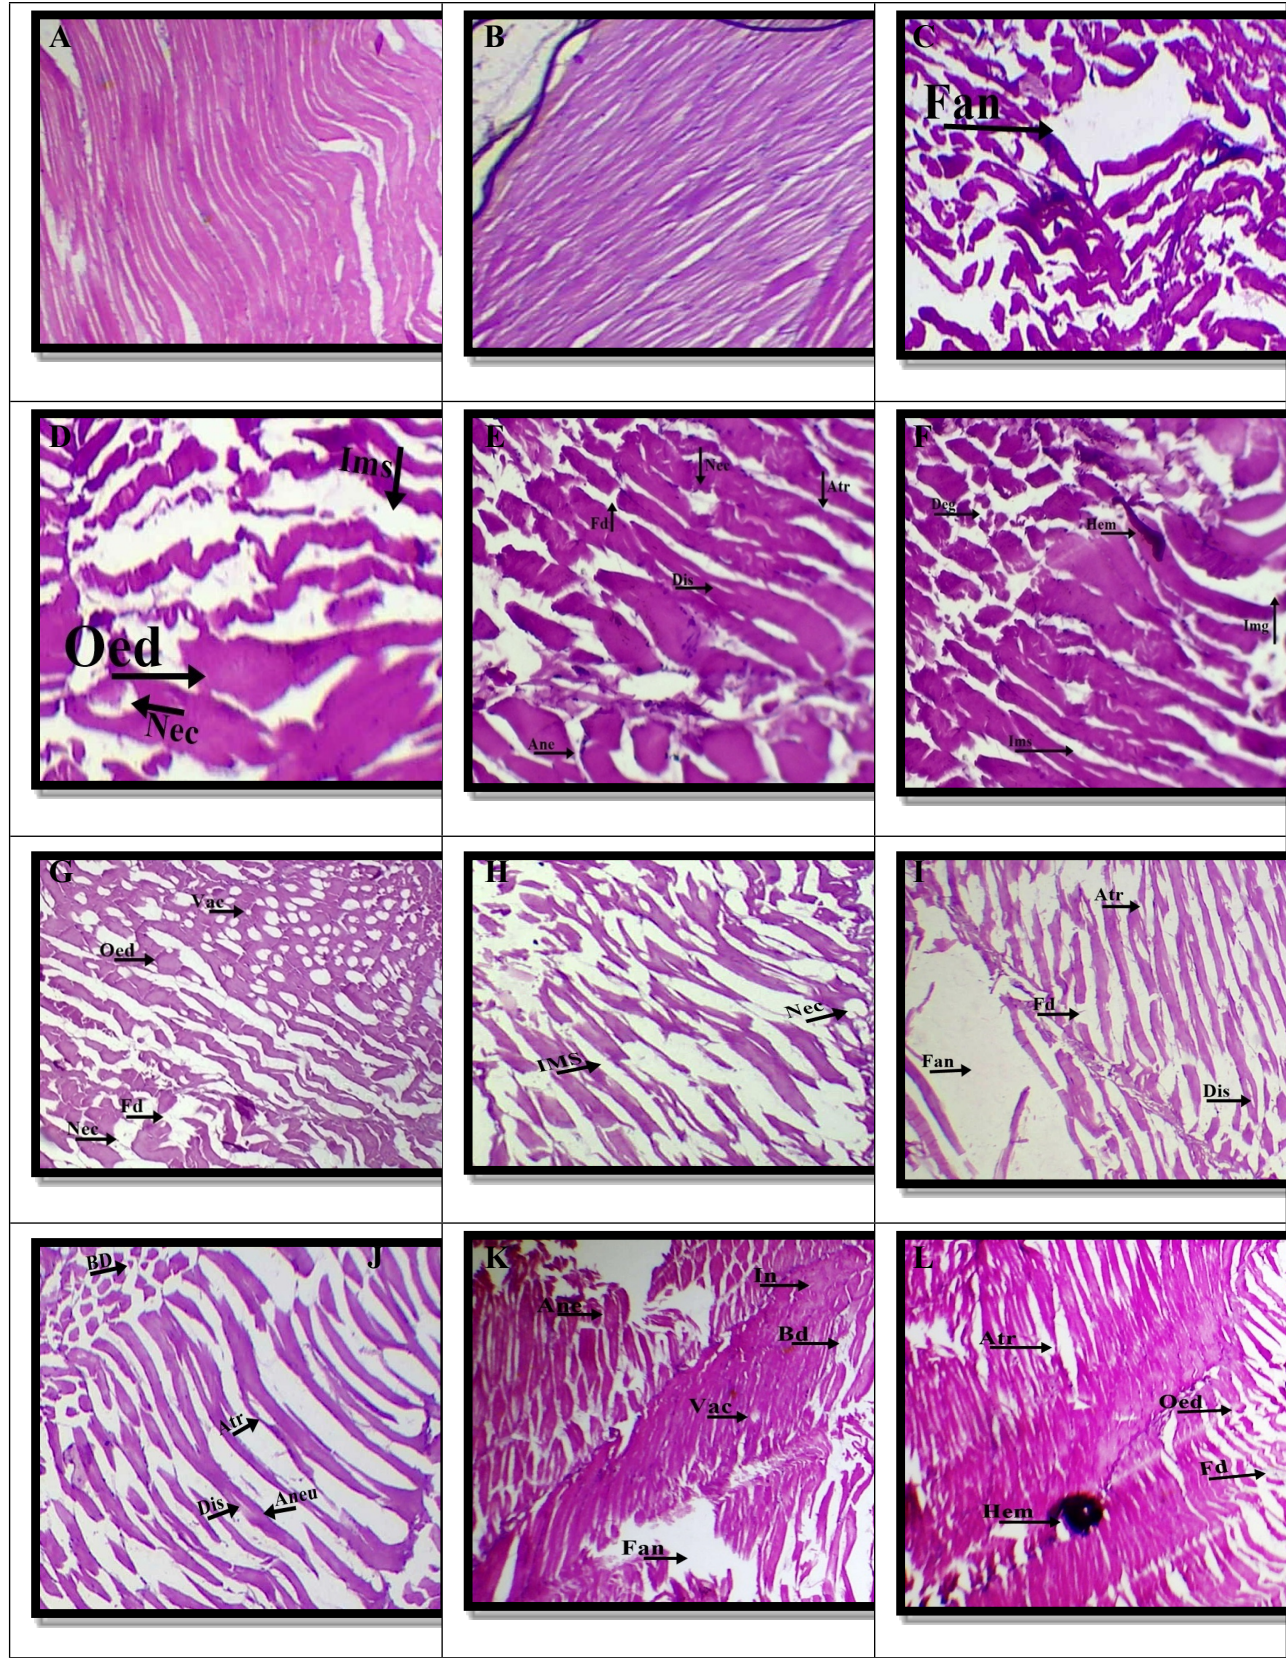



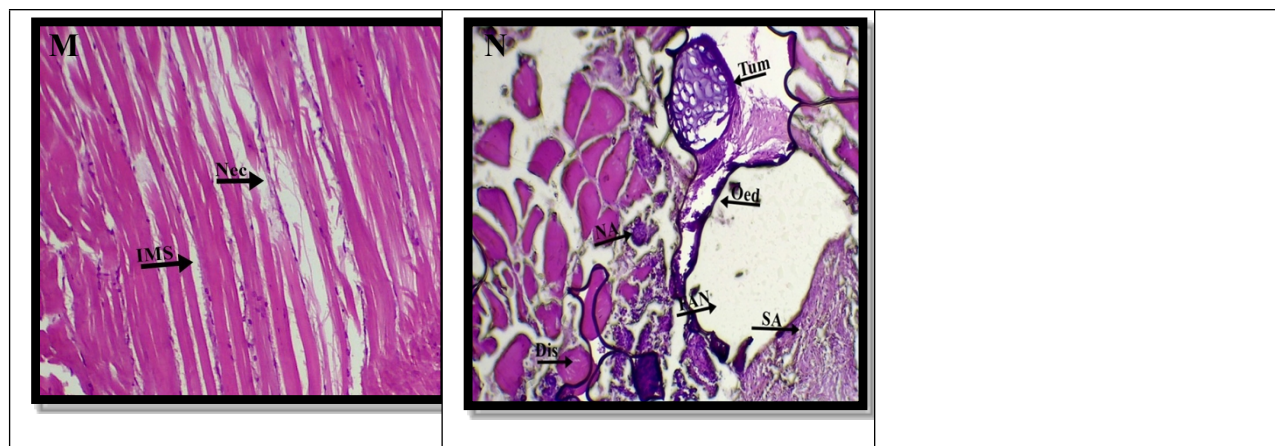

**Figure 5: Histopathological alteration of transversely paraffin sectioned of muscle of *Oreochromis niloticus* electron micrographs (10×&40×) (H&E). (A&B) Control, (C-F) 1/3<sup>rd</sup> of LC<sub>50</sub>, (G-J) 1/5<sup>th</sup> of LC<sub>50</sub>, (K-N) 1/10<sup>th</sup> of LC<sub>50</sub>. Normal architecture of muscle tissues were observed in the control fishes. Abbreviations are as= Hem=Hemorrhage, Oed=Oedema, Fd=Fiber damage, Aneu=Aneurysm, Atr=Atrophy, Bd=Bundle damage, Vac=Vacuolar degeneration, FAN=focal area of necrosis, Nec=Necrosis, IMS=Inter myofibril spaces, Dis=Disintegration, SA=Structural Alteration, NA=Nuclear Alteration, In=Inflammation and Tum=Tumor**

**Table 1: Physio-Chemical Parameter of Industrial Effluents of Sunder Industrial Estate, Lahore**

| Physico-Chemical Parameters         | Leather Industry | Textile Industry | Chemical-I Industry | Chemical-II Industry | Control        | Suitable Ranges |
|-------------------------------------|------------------|------------------|---------------------|----------------------|----------------|-----------------|
| pH                                  |                  | 7.17333±0.65     | 9.13333±1.53        | 8.08333±0.74         |                | 6.5-8.5         |
| EC (µScm-1)                         | 5835±794.21      | 1686.33±13.76    | 1629±20.53          | 1961±42.95           | 627.667±2.52   | Up to 1650      |
| TDS mgL <sup>-1</sup>               | 4959.33±675.17   | 1393.5±37.96     | 1401.13±50.42       | 1666.73±36.64        | 356.867±303.86 | Up to 1000      |
| Total Salinity mgL <sup>-1</sup>    | 4959.33±675.17   | 1.385±0.27       | 1.37±0.25           | 1.665±0.13           | 5.33±1         | Less than 1000  |
| CO <sub>2</sub> mgL <sup>-1</sup>   | Nil              | 200±4.47         | 200±4.47            | 220±22.36            | 200±5          | 0-15            |
| Chloride mgL <sup>-1</sup>          | 1010.21±321.39   | 445.167±57.64    | 1250.64±1150.93     | 347.125±96.51        | 350±5          | 10-400          |
| Mg mgL <sup>-1</sup>                | 130±142.44       | 90±98.65         | 346.667±128.72      | 460.833±88.68        | 220±5          | Less than 20    |
| Ca mgL <sup>-1</sup>                | 320±65.88        | 720±416.29       | 370±11.83           | 333.333±36.96        | 213.333±12.58  | 60-120          |
| Total Alkalinity mgL <sup>-1</sup>  | 1055±897.78      | 1111±174.21      | 807±121.33          | 909.5±28.21          | 680±5          | 50-400          |
| Carbon Alkalinity mgL <sup>-1</sup> | 585±640.84       | 1111±174.21      | 807.5±120.41        | 909.5±28.21          | 680±5          | 0-100           |
| P. Alkalinity mgL <sup>-1</sup>     | 826.667±107.74   | Nill             | Nill                | Nill                 | Nill           | 30-400          |
| Total Hardness mgL <sup>-1</sup>    | 380±153.43       | 560±44.05        | 716.667±139.31      | 790±120.58           | 420±5          | 60-120          |

Values are expressed as mean+S.D.

All the samples were analyzed in triplicates

**Table 2: Frequency and prevalence percentage (%) of histological alterations in the heart of *Oreochromis niloticus* exposed to sub-lethal levels of industrial effluents of Sunder Industrial Estate, Lahore**

| Histological Alteration | Control   |   | Treatment Groups |    |           |    |           |    |
|-------------------------|-----------|---|------------------|----|-----------|----|-----------|----|
|                         | Group A   |   | Group B          |    | Group C   |    | Group D   |    |
|                         | Frequency | % | Frequency        | %  | Frequency | %  | Frequency | %  |
| Hemorrhage              | 0         | 0 | 1                | 3  | 3         | 10 | 5         | 16 |
| Oedema                  | 0         | 0 | 8                | 26 | 13        | 43 | 19        | 63 |
| Pericardium bending     | 0         | 0 | -                | -  | 5         | 16 | 8         | 26 |
| Pericardium lifting     | 0         | 0 | -                | -  | 4         | 13 | 5         | 16 |
| Aneurysm                | 0         | 0 | 7                | 23 | 12        | 40 | 16        | 53 |
| Atrophy                 | 0         | 0 | 7                | 23 | 15        | 50 | 20        | 66 |
| Pericardium Damage      | 0         | 0 | -                | -  | 2         | 6  | 5         | 16 |
| Vacuolar degeneration   | 0         | 0 | 5                | 16 | 6         | 20 | 9         | 30 |
| focal area of necrosis  | 0         | 0 | 4                | 13 | 10        | 33 | 16        | 53 |
| Necrosis                | 0         | 0 | 5                | 16 | 18        | 60 | 13        | 43 |
| Hyperplasia             | 0         | 0 | 2                | 6  | 8         | 26 | 16        | 53 |
| Leucocytes Infiltration | 0         | 0 | 1                | 3  | 2         | 6  | 8         | 26 |
| Myocarditis             | 0         | 0 | 1                | 3  | 6         | 20 | 2         | 6  |
| Mean Value              |           |   | 41               |    | 104       |    | 142       |    |

**Table 3: Histological alterations index (HAI) calculated for determination of lesions in the Heart of *Oreochromis niloticus* exposed to sub-lethal level of industrial effluents of Sunder Industrial Estate, Lahore**

| Histologic Alteration               | Importance factor   | Index           | Score Value (a)                    |                                    |                                     | HAI Value ( a×w)                   |                                    |                                     |
|-------------------------------------|---------------------|-----------------|------------------------------------|------------------------------------|-------------------------------------|------------------------------------|------------------------------------|-------------------------------------|
|                                     |                     |                 | 1/3 <sup>rd</sup> LC <sub>50</sub> | 1/5 <sup>th</sup> LC <sub>50</sub> | 1/10 <sup>th</sup> LC <sub>50</sub> | 1/3 <sup>rd</sup> LC <sub>50</sub> | 1/5 <sup>th</sup> LC <sub>50</sub> | 1/10 <sup>th</sup> LC <sub>50</sub> |
| Hemorrhage                          | W <sub>HC1</sub> =1 | I <sub>HC</sub> | 1                                  | 1                                  | 1                                   | 1                                  | 1                                  | 1                                   |
| Oedema                              | W <sub>HC2</sub> =1 |                 | 2                                  | 2                                  | 2                                   | 2                                  | 2                                  | 2                                   |
| Pericardium bending                 | W <sub>HR1</sub> =1 | I <sub>HR</sub> | -                                  | 1                                  | 2                                   | -                                  | 1                                  | 2                                   |
| Pericardium lifting                 | W <sub>HR2</sub> =1 |                 | -                                  | 1                                  | 1                                   | -                                  | 1                                  | 1                                   |
| Aneurysm                            | W <sub>HR3</sub> =1 |                 | 1                                  | 2                                  | 2                                   | 1                                  | 2                                  | 2                                   |
| Atrophy                             | W <sub>HR4</sub> =2 |                 | 1                                  | 2                                  | 2                                   | 2                                  | 4                                  | 4                                   |
| Pericardium Damage                  | W <sub>HR5</sub> =1 |                 | -                                  | 1                                  | 1                                   | -                                  | 1                                  | 1                                   |
| Vacuolar degeneration               | W <sub>HR6</sub> =2 |                 | 1                                  | 1                                  | 2                                   | 2                                  | 2                                  | 4                                   |
| focal area of necrosis              | W <sub>HR7</sub> =3 |                 | 1                                  | 2                                  | 2                                   | 3                                  | 6                                  | 6                                   |
| Necrosis                            | W <sub>HR8</sub> =3 |                 | 1                                  | 2                                  | 2                                   | 3                                  | 6                                  | 6                                   |
| Hyperplasia                         | W <sub>HP1</sub> =2 | I <sub>HP</sub> | 1                                  | 2                                  | 2                                   | 2                                  | 4                                  | 4                                   |
| Leucocytes Infiltration             | W <sub>HP1</sub> =2 |                 | 1                                  | 1                                  | 2                                   | 2                                  | 2                                  | 4                                   |
| Myocarditis                         | W <sub>HP2</sub> =1 | I <sub>HI</sub> | 1                                  | 1                                  | 1                                   | 1                                  | 1                                  | 1                                   |
| Mean value of HAI <sub>Kidney</sub> |                     |                 |                                    |                                    |                                     |                                    | 19                                 | 33                                  |

- HC= Heart circulatory disturbance; HR= Heart regressive changes; HP= Heart progressive changes; HI= Heart Inflammation

**Table 4: Frequency and prevalence percentage (%) of histological alterations in the Kidney of *Oreochromis niloticus* exposed to sub-lethal level of industrial effluents of Sunder Industrial Estate, Lahore**

| Histological Alterations         | Control   |   | Treatment Groups                   |    |                                    |    |                                     |    |
|----------------------------------|-----------|---|------------------------------------|----|------------------------------------|----|-------------------------------------|----|
|                                  | Frequency | % | 1/3 <sup>rd</sup> LC <sub>50</sub> |    | 1/5 <sup>th</sup> LC <sub>50</sub> |    | 1/10 <sup>th</sup> LC <sub>50</sub> |    |
|                                  |           |   | Frequency                          | %  | Frequency                          | %  | Frequency                           | %  |
| Glomerulus shrinkage             | 0         | 0 | 6                                  | 20 | 9                                  | 30 | 22                                  | 73 |
| Focal area of necrosis           | 0         | 0 | 8                                  | 26 | 13                                 | 43 | 21                                  | 70 |
| Glomerulus arteries degeneration | 0         | 0 | 5                                  | 16 | 8                                  | 26 | 10                                  | 33 |
| Necrotic proximal tubule         | 0         | 0 | 15                                 | 50 | 9                                  | 30 | 16                                  | 53 |
| Increase Glomerulus space        | 0         | 0 | 7                                  | 23 | 10                                 | 33 | 25                                  | 83 |
| Glomerulus structural alteration | 0         | 0 | 3                                  | 10 | 5                                  | 16 | 9                                   | 30 |
| Hemorrhage                       | 0         | 0 | 1                                  | 3  | 3                                  | 10 | 7                                   | 23 |
| Necrotic renal tubule            | 0         | 0 | 5                                  | 16 | 6                                  | 20 | 9                                   | 30 |
| Increase tubular lumen           | 0         | 0 | 10                                 | 33 | 7                                  | 23 | 17                                  | 56 |
| vacuolar degeneration            | 0         | 0 | 2                                  | 6  | 5                                  | 16 | 8                                   | 26 |
| Necrosis                         | 0         | 0 | 6                                  | 20 | 7                                  | 23 | 12                                  | 40 |
| Renal tubule degeneration        | 0         | 0 | 5                                  | 16 | 8                                  | 26 | 10                                  | 33 |
| Bowman's capsule disintegration  | 0         | 0 | 6                                  | 20 | 10                                 | 33 | 16                                  | 53 |
| Hydropic swelling                | 0         | 0 | 4                                  | 13 | 7                                  | 23 | 11                                  | 36 |
| Leukocyte infiltration           | 0         | 0 | 3                                  | 10 | 4                                  | 13 | 6                                   | 20 |
| Mean Value                       |           |   | 86                                 |    | 111                                |    | 199                                 |    |

**Table 5: Histological alterations index (HAI) calculated for determination of lesions in the Kidney of *Oreochromis niloticus* exposed to sub-lethal level of industrial effluents of Sunder Industrial Estate, Lahore**

| Histological alterations         | Importance factor (w) | Index           | Score Value (a)                    |                                    |                                     | HAI Value (a×w)                    |                                    |                                     |
|----------------------------------|-----------------------|-----------------|------------------------------------|------------------------------------|-------------------------------------|------------------------------------|------------------------------------|-------------------------------------|
|                                  |                       |                 | 1/3 <sup>rd</sup> LC <sub>50</sub> | 1/5 <sup>th</sup> LC <sub>50</sub> | 1/10 <sup>th</sup> LC <sub>50</sub> | 1/3 <sup>rd</sup> LC <sub>50</sub> | 1/5 <sup>th</sup> LC <sub>50</sub> | 1/10 <sup>th</sup> LC <sub>50</sub> |
| Hemorrhage                       | W <sub>KC1</sub> =1   | I <sub>KC</sub> | 1                                  | 2                                  | 3                                   | 1                                  | 2                                  | 3                                   |
| Focal area of necrosis           | W <sub>KC1</sub> =1   | I <sub>KR</sub> | 1                                  | 2                                  | 3                                   | 1                                  | 2                                  | 3                                   |
| Glomerulus arteries degeneration | W <sub>KR2</sub> =1   |                 | 1                                  | 2                                  | 3                                   | 1                                  | 2                                  | 3                                   |
| Necrotic proximal tubule         | W <sub>KR3</sub> =3   |                 | 3                                  | 2                                  | 3                                   | 9                                  | 6                                  | 9                                   |
| Increase Glomerulus space        | W <sub>KR4</sub> =1   |                 | 1                                  | 2                                  | 3                                   | 1                                  | 2                                  | 3                                   |
| Glomerulus structural alteration | W <sub>KR5</sub> =2   |                 | 1                                  | 2                                  | 3                                   | 2                                  | 4                                  | 6                                   |

|                                 |              |          |   |   |   |    |    |    |
|---------------------------------|--------------|----------|---|---|---|----|----|----|
| Glomerulus shrinkage            | $W_{KR6}=2$  |          | 1 | 2 | 3 | 2  | 4  | 6  |
| Necrotic renal tubule           | $W_{KR7}=2$  |          | 1 | 2 | 3 | 2  | 4  | 6  |
| Increase tubular lumen          | $W_{KR8}=3$  |          | 2 | 1 | 3 | 6  | 3  | 9  |
| vacuolar degeneration           | $W_{KR9}=1$  |          | 1 | 2 | 3 | 1  | 2  | 3  |
| Bowman's capsule disintegration | $W_{KR10}=1$ |          | 1 | 2 | 2 | 1  | 2  | 2  |
| Hydropic swelling               | $W_{KR11}=1$ |          | 1 | 1 | 2 | 1  | 1  | 2  |
| Necrosis                        | $W_{KP1}=1$  | $I_{KP}$ | 2 | 2 | 3 | 2  | 2  | 3  |
| Renal tubule degeneration       | $W_{KP2}=1$  |          | 1 | 2 | 3 | 1  | 2  | 3  |
| Leukocyte infiltration          | $W_{KI1}=1$  | $I_{KI}$ | 1 | 2 | 3 | 1  | 2  | 4  |
| Mean value of $HAI_{Kidney}$    |              |          |   |   |   | 32 | 40 | 60 |

- KC= Kidney circulatory disturbance; KR= Kidney regressive changes; KP= Kidney progressive changes; KI= Kidney inflammation

**Table 6: Frequency and prevalence percentage (%) of histological alterations in the Muscle of *Oreochromis niloticus* exposed to sub-lethal levels of industrial effluents of Sunder Industrial Estate, Lahore**

| Histological Alteration | Control   |   | Treatment Groups |    |           |    |           |    |
|-------------------------|-----------|---|------------------|----|-----------|----|-----------|----|
|                         | Group A   |   | Group B          |    | Group C   |    | Group D   |    |
|                         | Frequency | % | Frequency        | %  | Frequency | %  | Frequency | %  |
| Atrophy                 | 0         | 0 | 9                | 30 | 15        | 43 | 20        | 66 |
| Oedema                  | 0         | 0 | 7                | 23 | 14        | 46 | 18        | 60 |
| Hemorrhage              | 0         | 0 | -                | -  | 1         | 3  | 7         | 23 |
| Fiber damage            | 0         | 0 | 9                | 30 | 12        | 40 | 17        | 56 |
| Aneurysm                | 0         | 0 | 8                | 26 | 11        | 36 | 16        | 53 |
| Inflammation            | 0         | 0 | 5                | 16 | 8         | 26 | 11        | 36 |
| Bundle damage           | 0         | 0 | 6                | 20 | 10        | 33 | 15        | 50 |
| Vacuolar degeneration   | 0         | 0 | 4                | 13 | 6         | 20 | 10        | 33 |
| focal area of necrosis  | 0         | 0 | 5                | 15 | 12        | 40 | 18        | 60 |
| Necrosis                | 0         | 0 | 6                | 20 | 22        | 73 | 16        | 53 |
| Inter myofibril spaces  | 2         | 6 | 10               | 33 | 18        | 60 | 25        | 83 |
| Disintegration          | 0         | 0 | 8                | 26 | 15        | 50 | 20        | 66 |
| Tumor                   | 0         | 0 | -                | -  | -         | -  | 3         | 10 |
| Structural Alteration   | 0         | 0 | -                | -  | -         | -  | 10        | 33 |
| Nuclear Alteration      | 0         | 0 | -                | -  | -         | -  | 7         | 23 |
| Mean Value              | 2         |   | 77               |    | 144       |    | 215       |    |

**Table 7: Histological alterations index (HAI) calculated for determination of lesions in the Muscle of *Oreochromis niloticus* exposed to sub-lethal level of industrial effluents of Sunder Industrial Estate, Lahore**

|  |  |  | Score Value (a) | HAI Value ( a×w) |
|--|--|--|-----------------|------------------|
|--|--|--|-----------------|------------------|

| Historical Alteration                     | Importance factor | Index                 | 1/3 <sup>rd</sup> LC <sub>50</sub> | 1/5 <sup>th</sup> LC <sub>50</sub> | 1/10 <sup>th</sup> LC <sub>50</sub> | 1/3 <sup>rd</sup> LC <sub>50</sub> | 1/5 <sup>th</sup> LC <sub>50</sub> | 1/10 <sup>th</sup> LC <sub>50</sub> |
|-------------------------------------------|-------------------|-----------------------|------------------------------------|------------------------------------|-------------------------------------|------------------------------------|------------------------------------|-------------------------------------|
| Hemorrhage                                | $W_{MC1}=1$       | <b>I<sub>MC</sub></b> | -                                  | 1                                  | 1                                   | -                                  | 1                                  | 1                                   |
| Oedema                                    | $W_{MC2}=1$       |                       | 1                                  | 2                                  | 2                                   | 1                                  | 2                                  | 2                                   |
| Fiber damage                              | $W_{MR1}=1$       | <b>I<sub>MR</sub></b> | 2                                  | 2                                  | 2                                   | 2                                  | 2                                  | 2                                   |
| Aneurysm                                  | $W_{MR2}=1$       |                       | 2                                  | 2                                  | 2                                   | 2                                  | 2                                  | 2                                   |
| Atrophy                                   | $W_{MR3}=2$       |                       | 2                                  | 2                                  | 2                                   | 4                                  | 4                                  | 4                                   |
| Bundle damage                             | $W_{MR4}=1$       |                       | 1                                  | 2                                  | 2                                   | 1                                  | 2                                  | 2                                   |
| Vacuolar degeneration                     | $W_{MR5}=1$       |                       | 1                                  | 1                                  | 2                                   | 1                                  | 1                                  | 2                                   |
| focal area of necrosis                    | $W_{MR6}=3$       |                       | 1                                  | 2                                  | 2                                   | 3                                  | 6                                  | 6                                   |
| Necrosis                                  | $W_{MR7}=3$       |                       | 1                                  | 2                                  | 2                                   | 3                                  | 6                                  | 6                                   |
| Inter myofibril spaces                    | $W_{MR8}=1$       |                       | 2                                  | 2                                  | 3                                   | 2                                  | 2                                  | 3                                   |
| Disintegration                            | $W_{MR9}=1$       |                       | 2                                  | 2                                  | 2                                   | 2                                  | 2                                  | 2                                   |
| Structural Alteration                     | $W_{MR10}=1$      |                       | -                                  | -                                  | 2                                   | -                                  | -                                  | 2                                   |
| Nuclear Alteration                        | $W_{MR11}=2$      |                       | -                                  | -                                  | 1                                   | -                                  | -                                  | 2                                   |
| Inflammation                              | $W_{MI1}=1$       | <b>I<sub>MI</sub></b> | 1                                  | 2                                  | 4                                   | 1                                  | 2                                  | 4                                   |
| Tumor                                     | $W_{MT1}=3$       | <b>I<sub>MT</sub></b> | -                                  | -                                  | 4                                   | -                                  | -                                  | 12                                  |
| <b>Mean value of HAI<sub>Muscle</sub></b> |                   |                       |                                    |                                    |                                     | <b>22</b>                          | <b>32</b>                          | <b>52</b>                           |

- MC= Muscle circulatory disturbance; MR= Muscle regressive changes; MI= Muscle inflammation; MT= Muscle tumor

**Study Area:  
Sunder Industrial Area (Lahore)**

- ★ Textile Industry
- ★ Tannery Industry
- ★ Chemical Industry-1
- ★ Chemical Industry-2

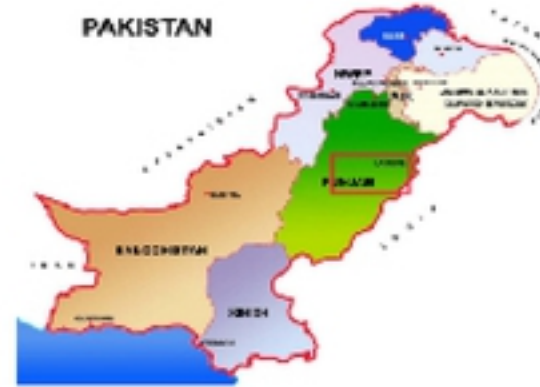

bioRxiv preprint doi: <https://doi.org/10.1101/2022.01.13.476240>; this version posted January 13, 2022. The copyright holder for this preprint (which was not certified by peer review) is the author/funder, who has granted bioRxiv a license to display the preprint in perpetuity. It is made available under aCC-BY 4.0 International license.

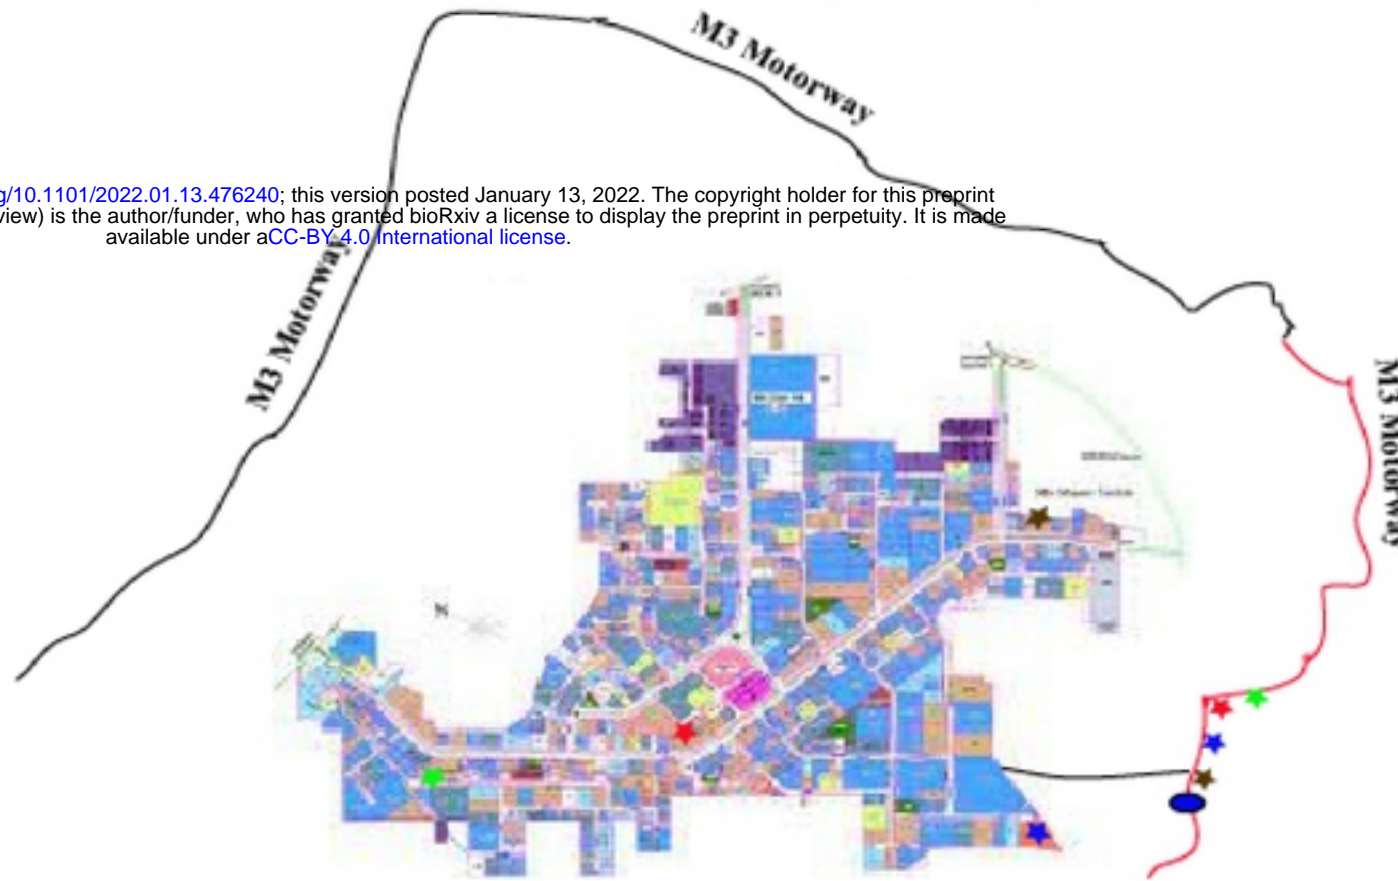

Figure 1: Geographical map of study area

bioRxiv preprint doi: <https://doi.org/10.1101/2022.01.13.476240>; this version posted January 13, 2022. The copyright holder for this preprint (which was not certified by peer review) is the author/funder, who has granted bioRxiv a license to display the preprint in perpetuity. It is made available under a [CC-BY 4.0 International license](#).

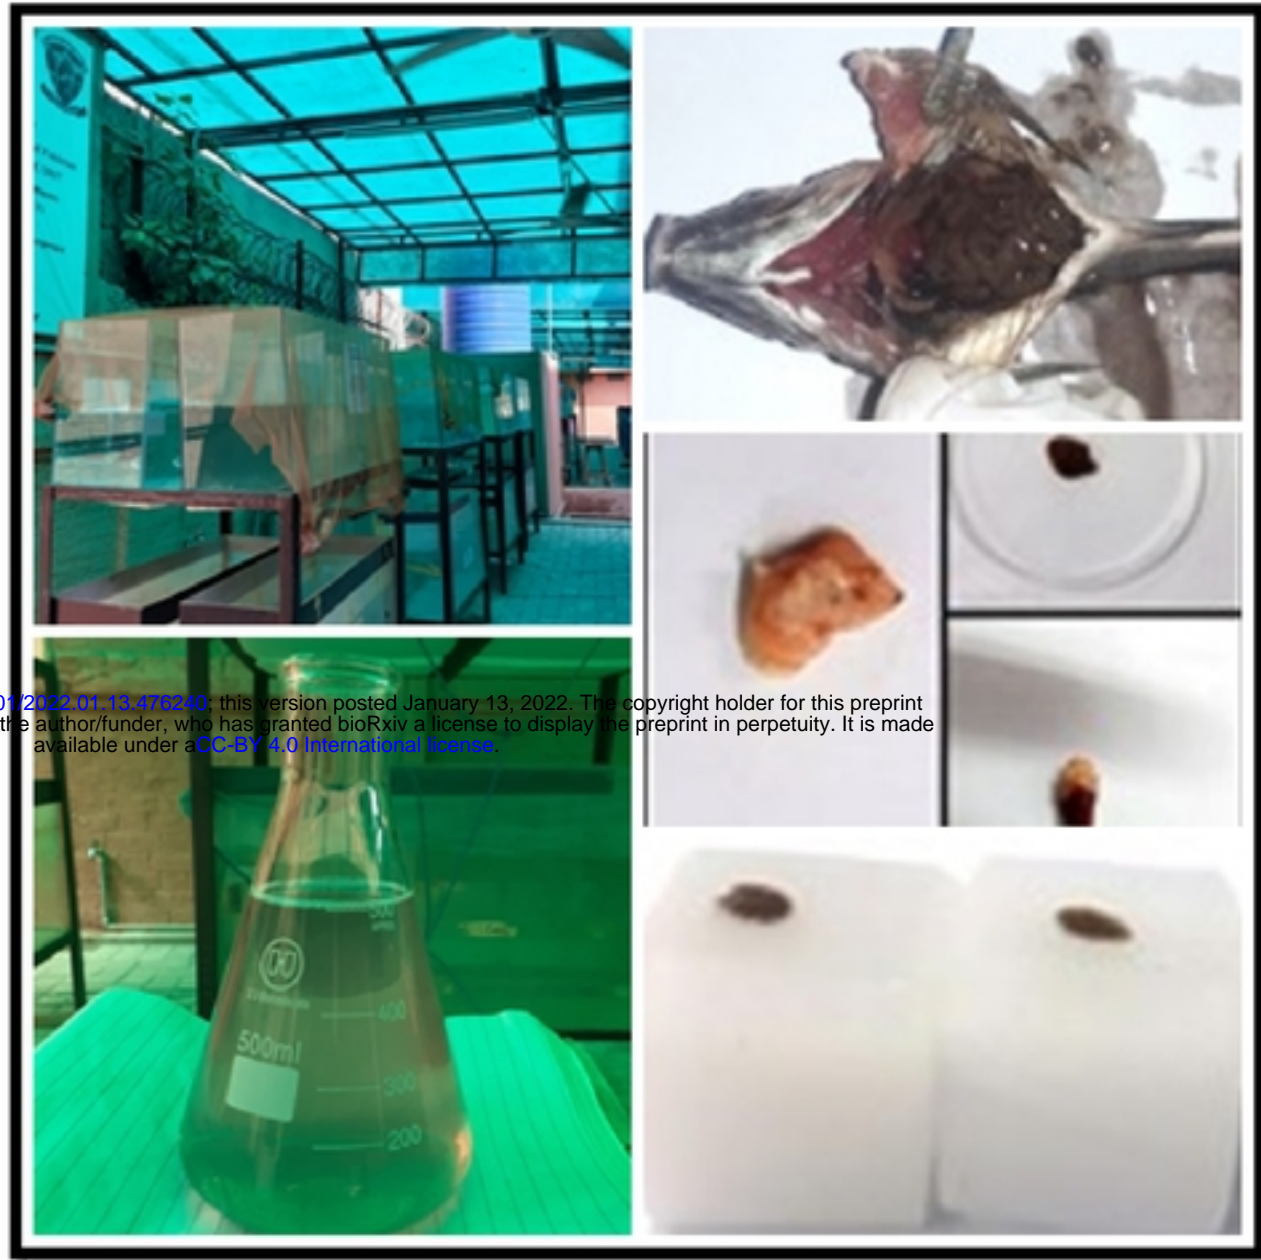

Figure 2: Overall representation of experiment

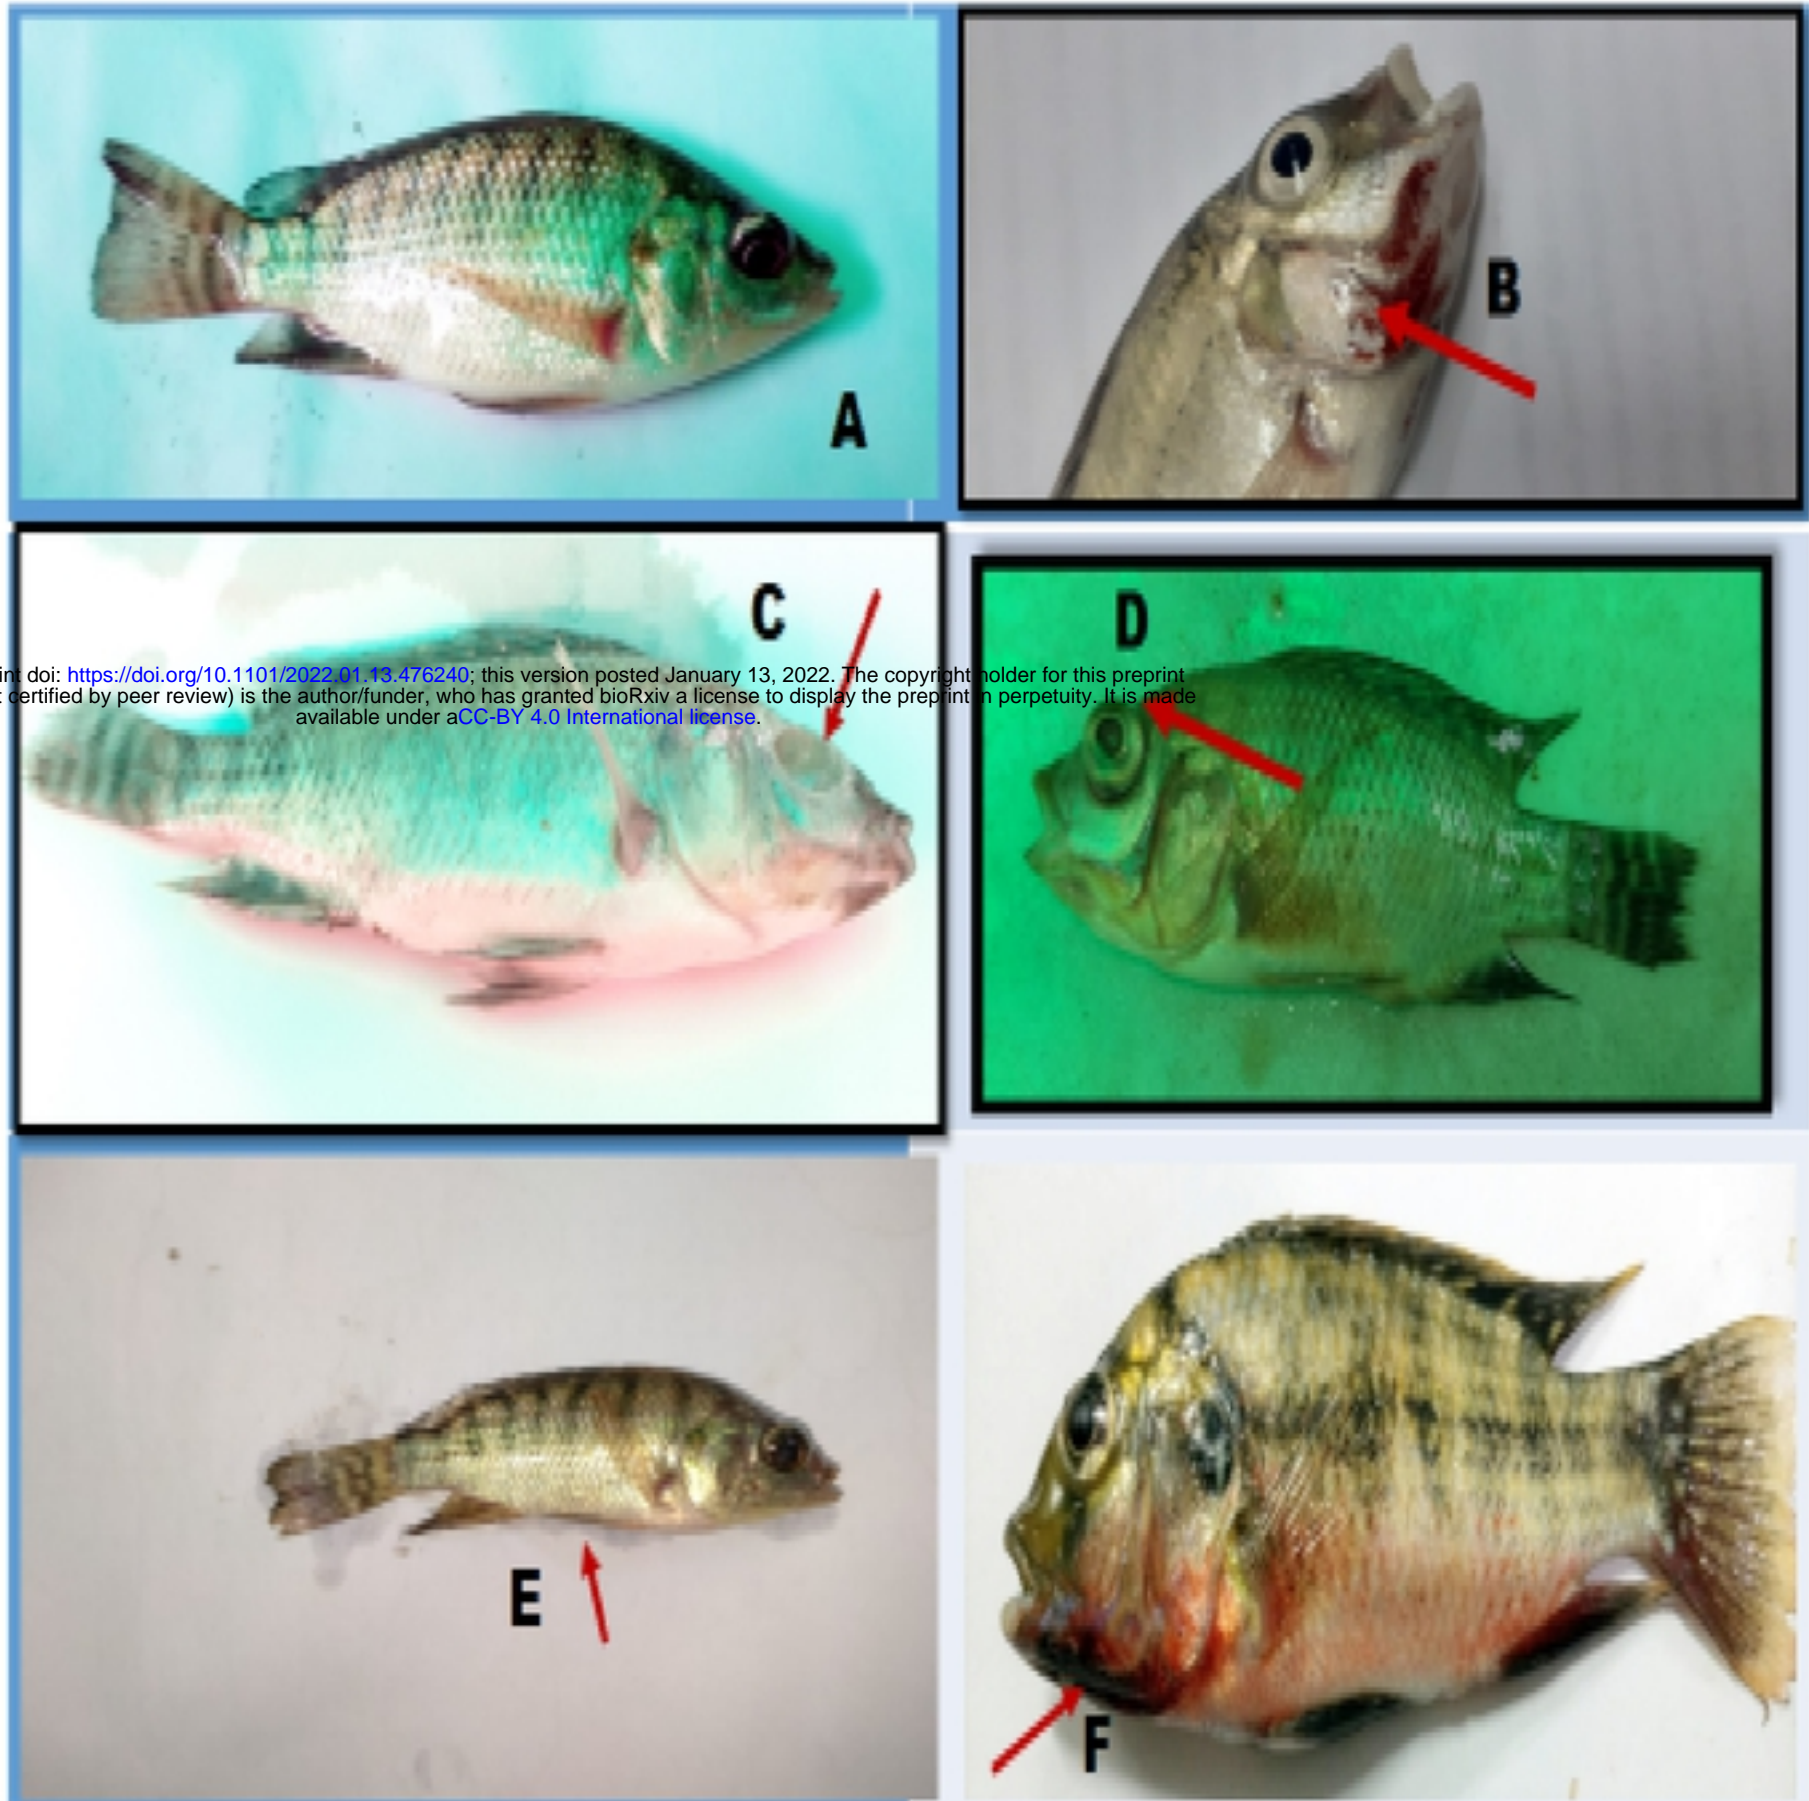

Figure 2.1. (A-F). Normal features of *Oreochromis niloticus* (A); Inflammation and swelling (B); Clogging of eye and loss of vision (C); Exophthalmia (D); skeletal deformity and curvature (E) and Hemorrhage (F) due to sub-lethal industrial effluent exposure.



bioRxiv preprint doi: <https://doi.org/10.1101/2022.01.13.476240>; this version posted January 13, 2022. The copyright holder for this preprint (which was not certified by peer review) is the author/funder, who has granted bioRxiv a license to display the preprint in perpetuity. It is made available under aCC-BY 4.0 International license.

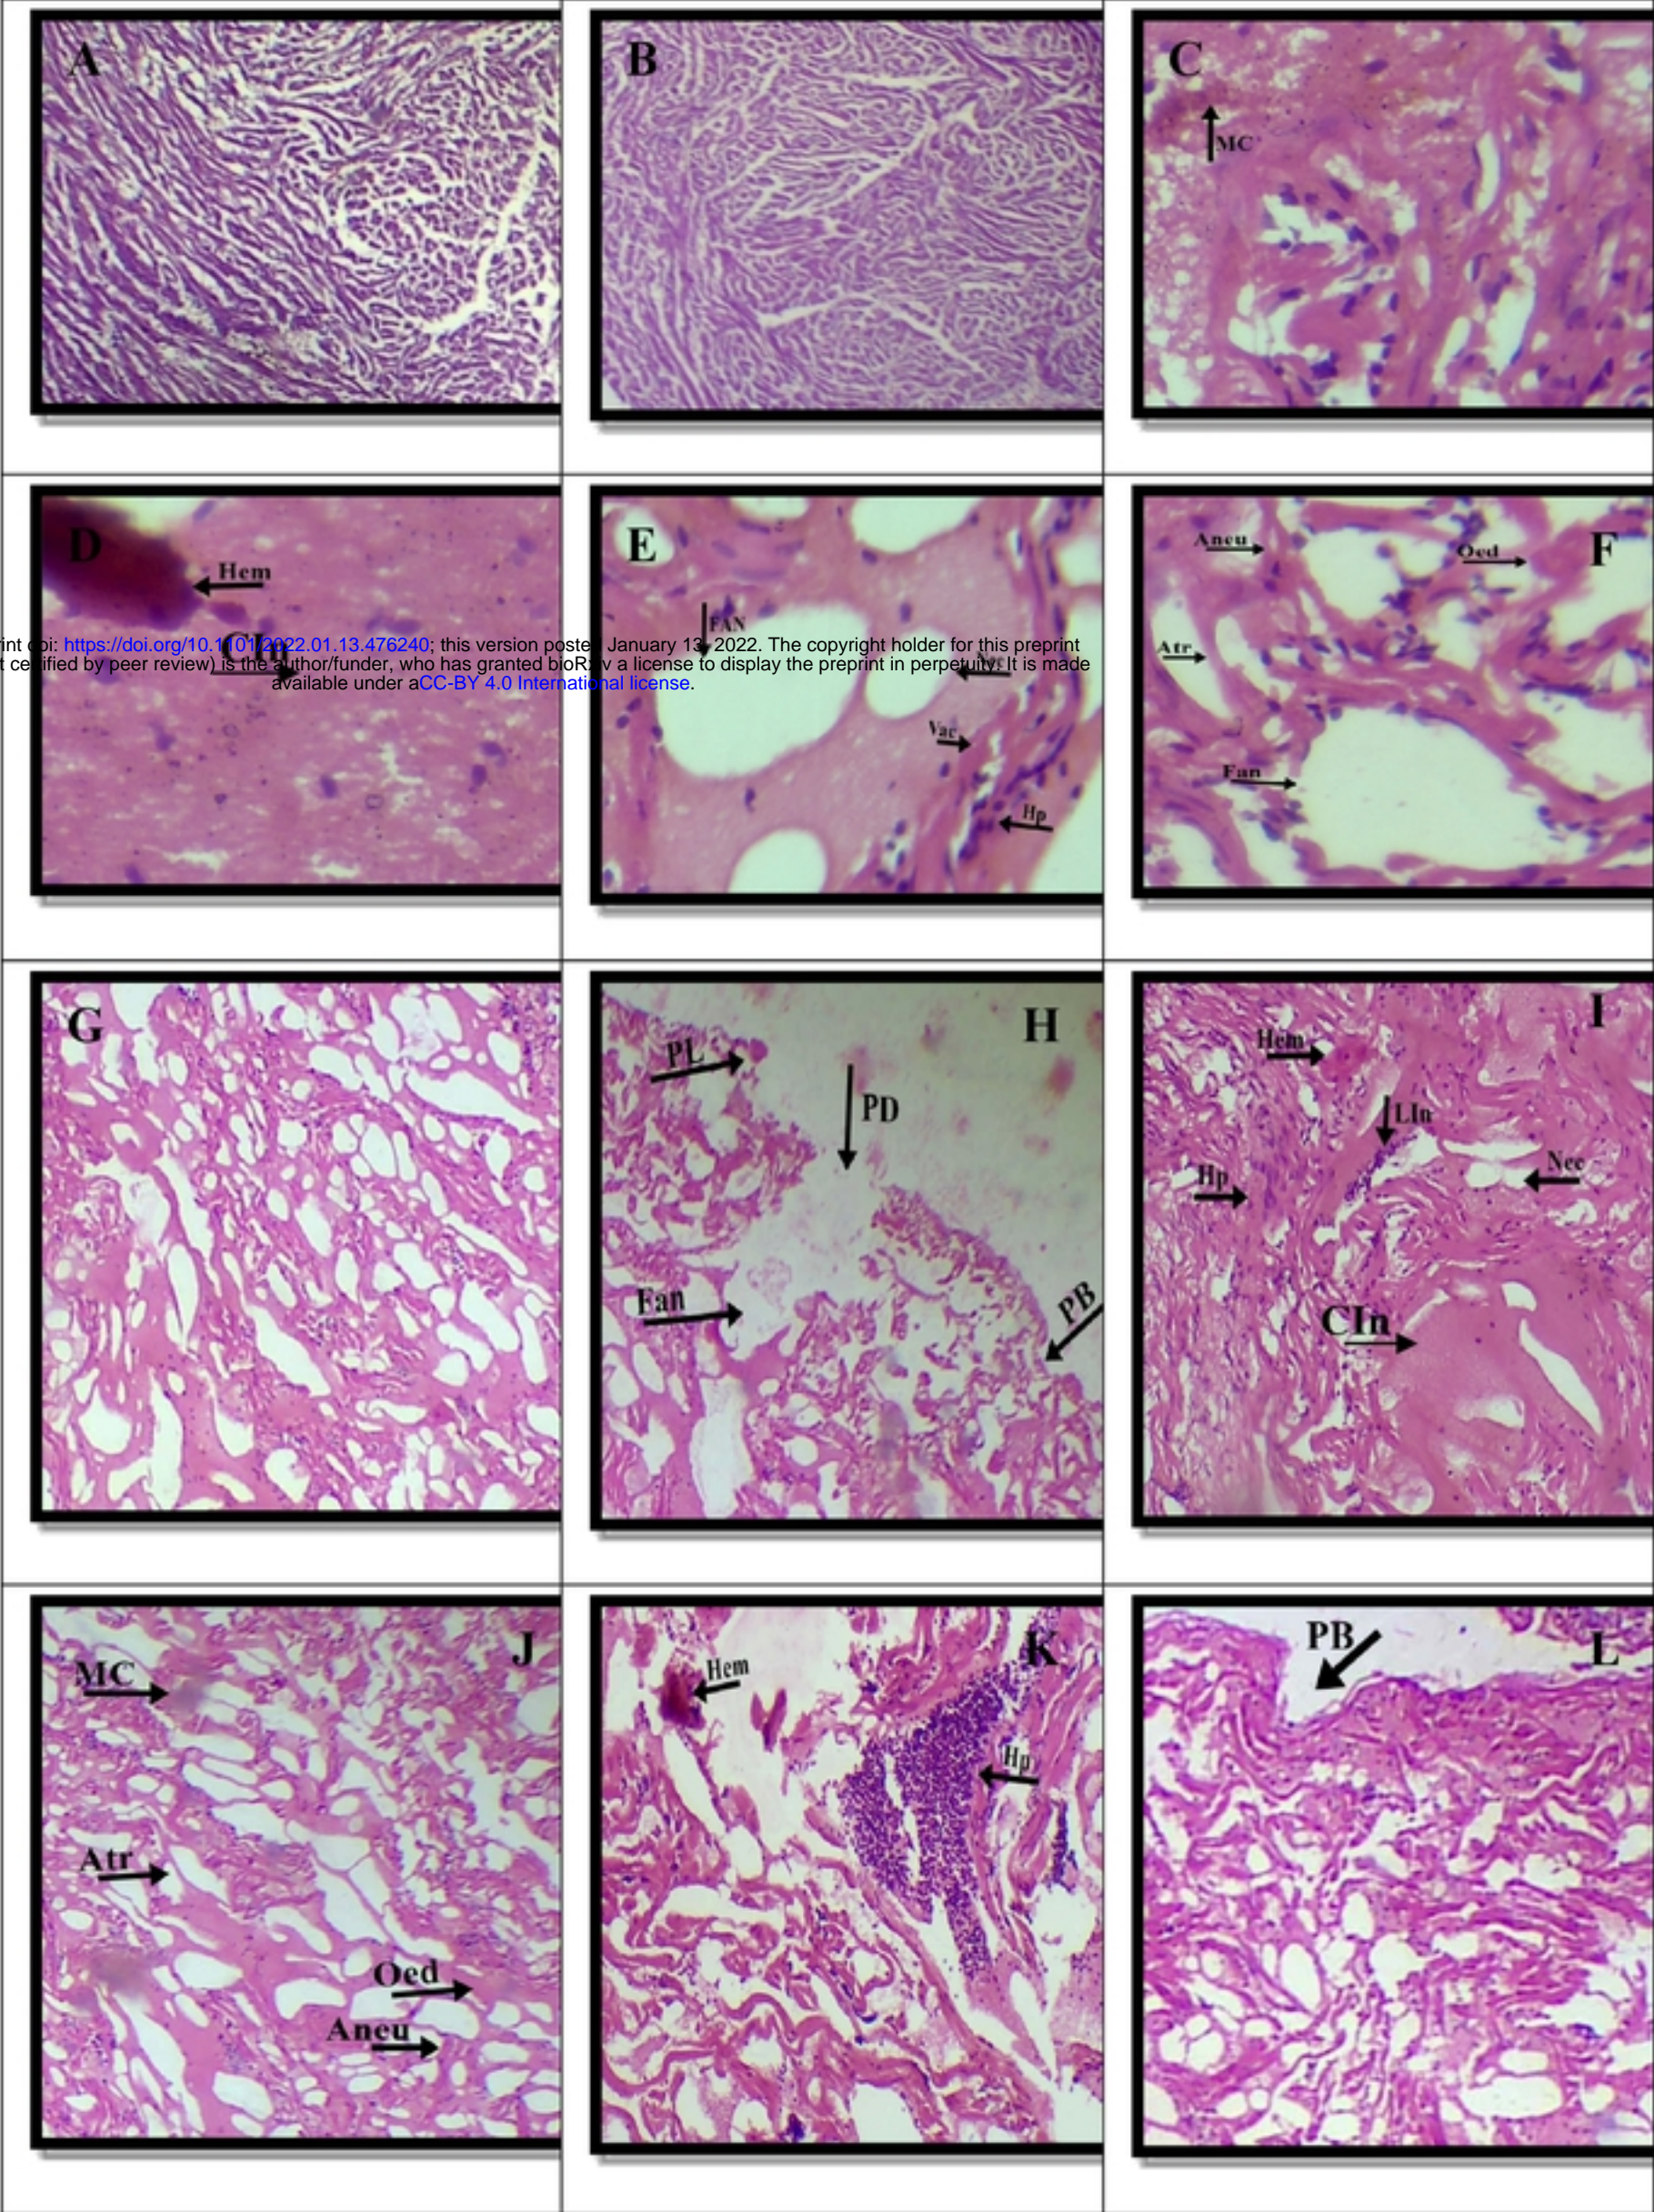

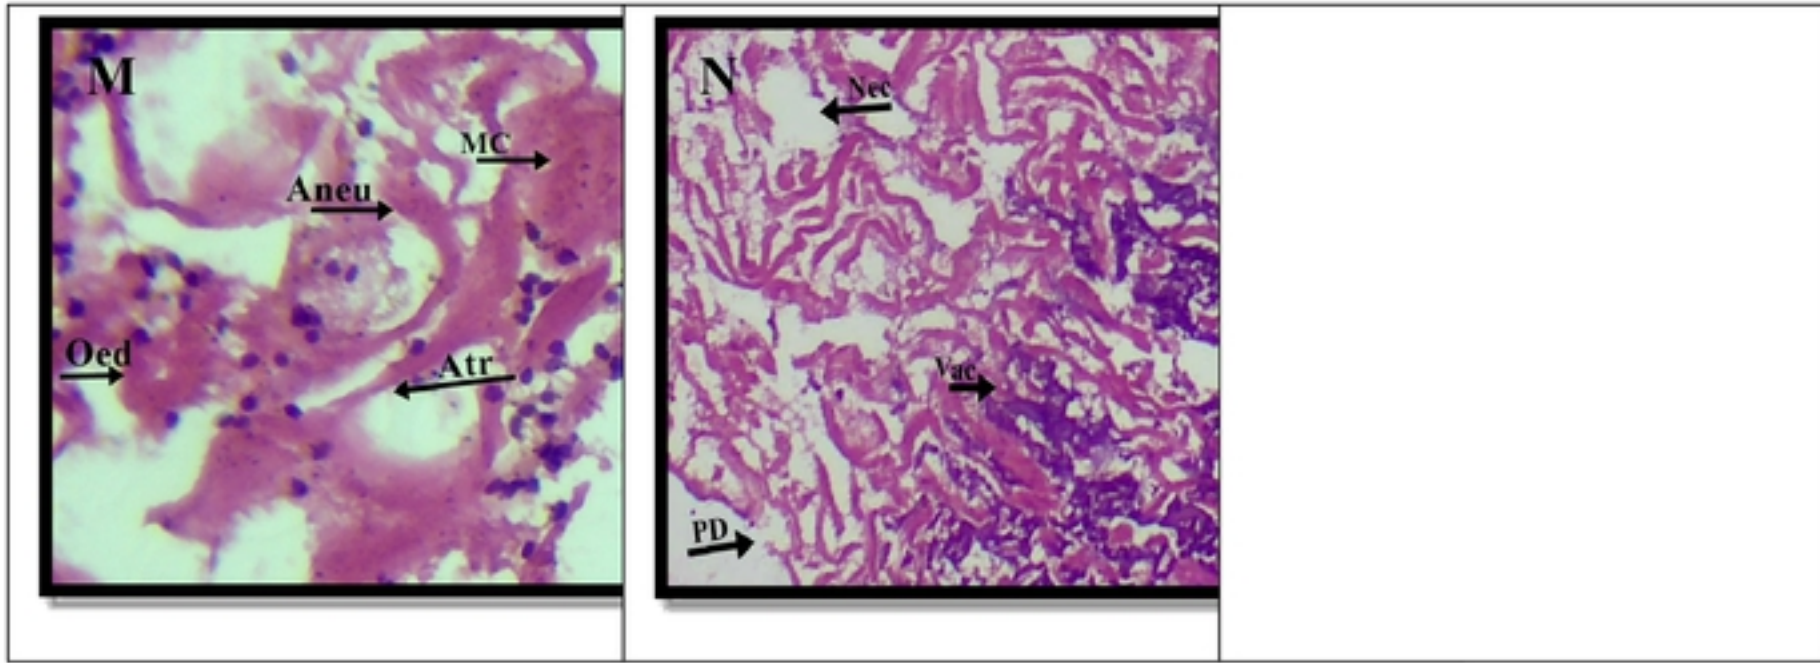

bioRxiv preprint doi: <https://doi.org/10.1101/2022.01.13.476240>; this version posted January 13, 2022. The copyright holder for this preprint (which was not certified by peer review) is the author/funder, who has granted bioRxiv a license to display the preprint in perpetuity. It is made available under aCC-BY 4.0 International license.

**Figure 3: Histopathological alteration of transversely paraffin sectioned of Heart of *Oreochromis niloticus* (M-N) 1/10<sup>th</sup> of LC<sub>50</sub>, (G-I) 1/5<sup>th</sup> of LC<sub>50</sub>, (J) 1/5<sup>th</sup> of LC<sub>50</sub>, (K-N) 1/10<sup>th</sup> of LC<sub>50</sub>. Normal architecture of muscle tissues were observed in the control fishes. Abbreviations are as= Hem=Hemorrhage, FAN= Focal area of necrosis, Oed=Oedema, PB=Pericardium bending, PL=Pericardium lifting, Aneu=Aneurysm, Atr=Atrophy, PD=Pericardium Damage, Vac=Vacuolar degeneration, Nec=Necrosis, HP=Hyperplasia, LI=Leucocytes Infiltration and MC=Myocarditis**

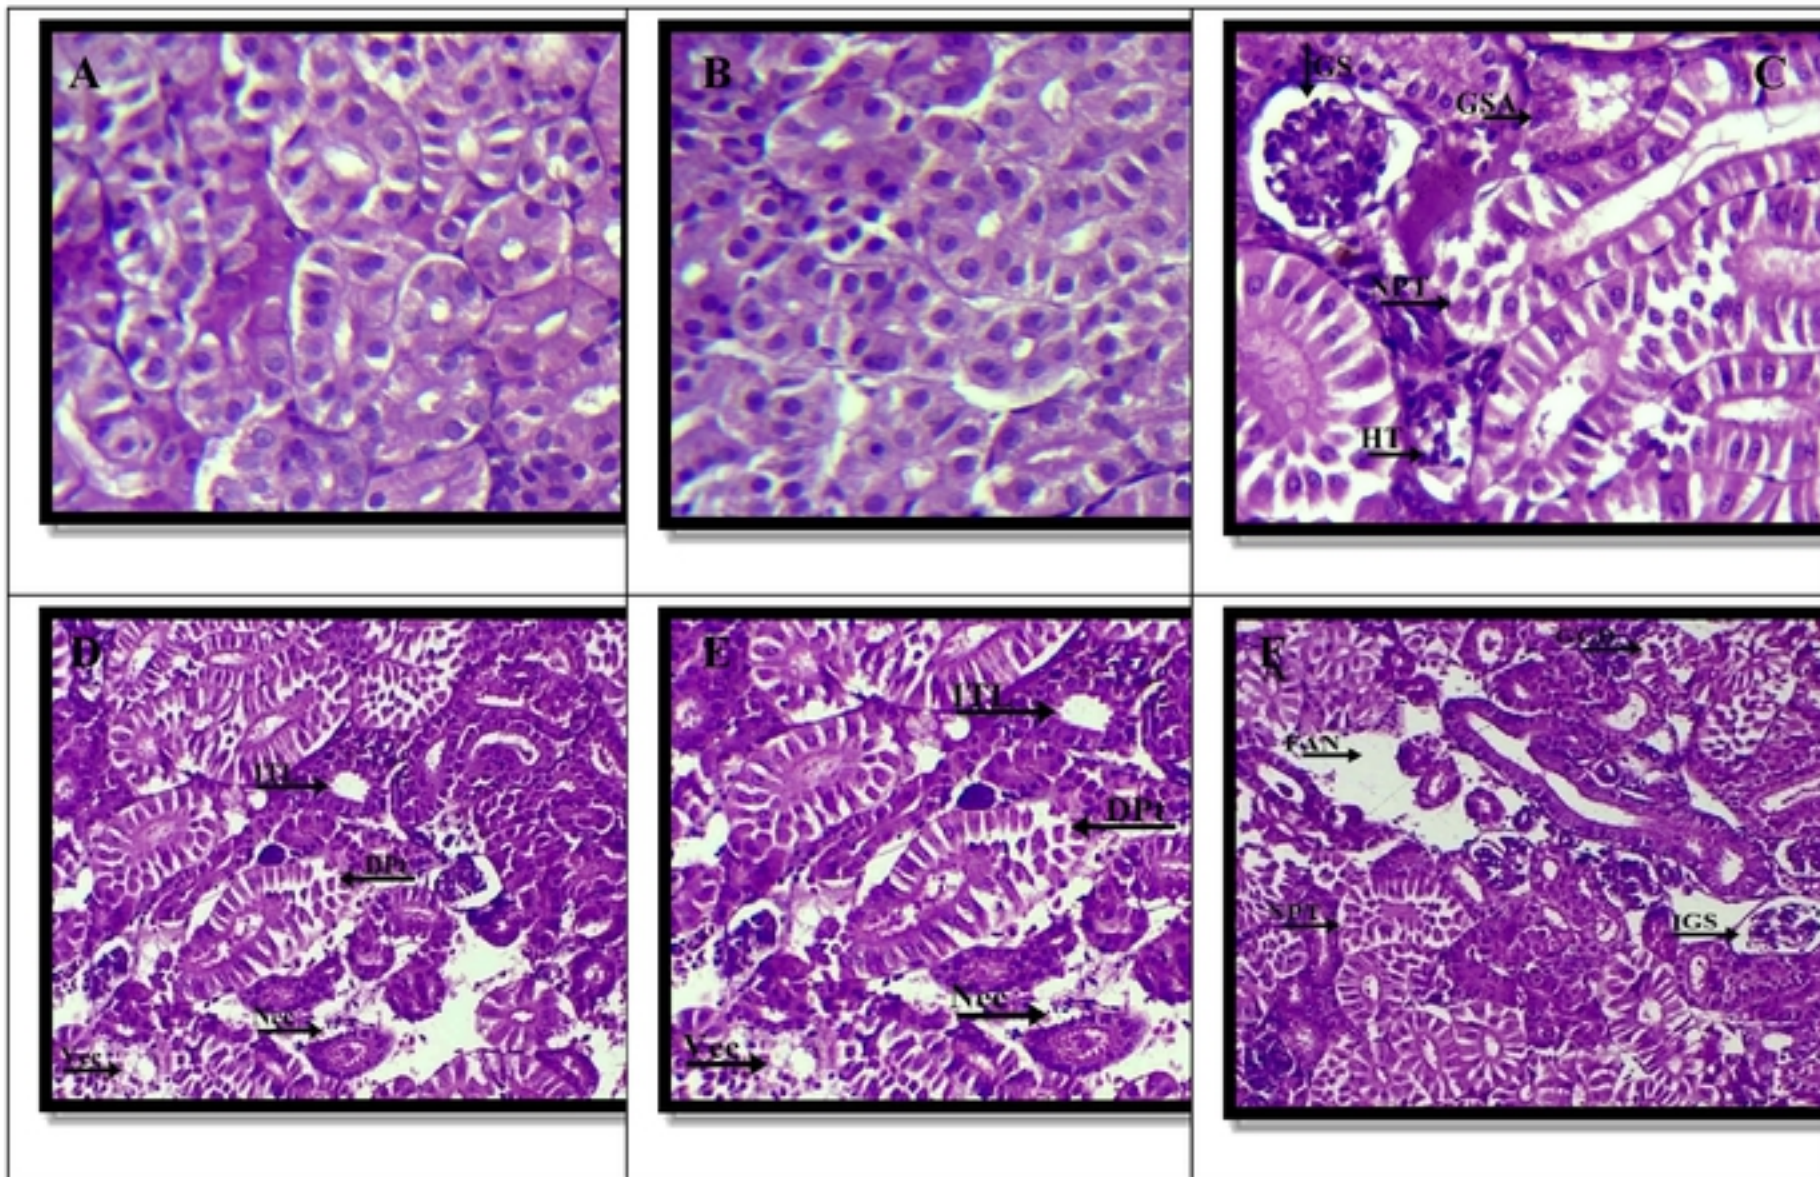

bioRxiv preprint doi: <https://doi.org/10.1101/2022.01.13.476240>; this version posted January 13, 2022. The copyright holder for this preprint (which was not certified by peer review) is the author/funder, who has granted bioRxiv a license to display the preprint in perpetuity. It is made available under aCC-BY 4.0 International license.

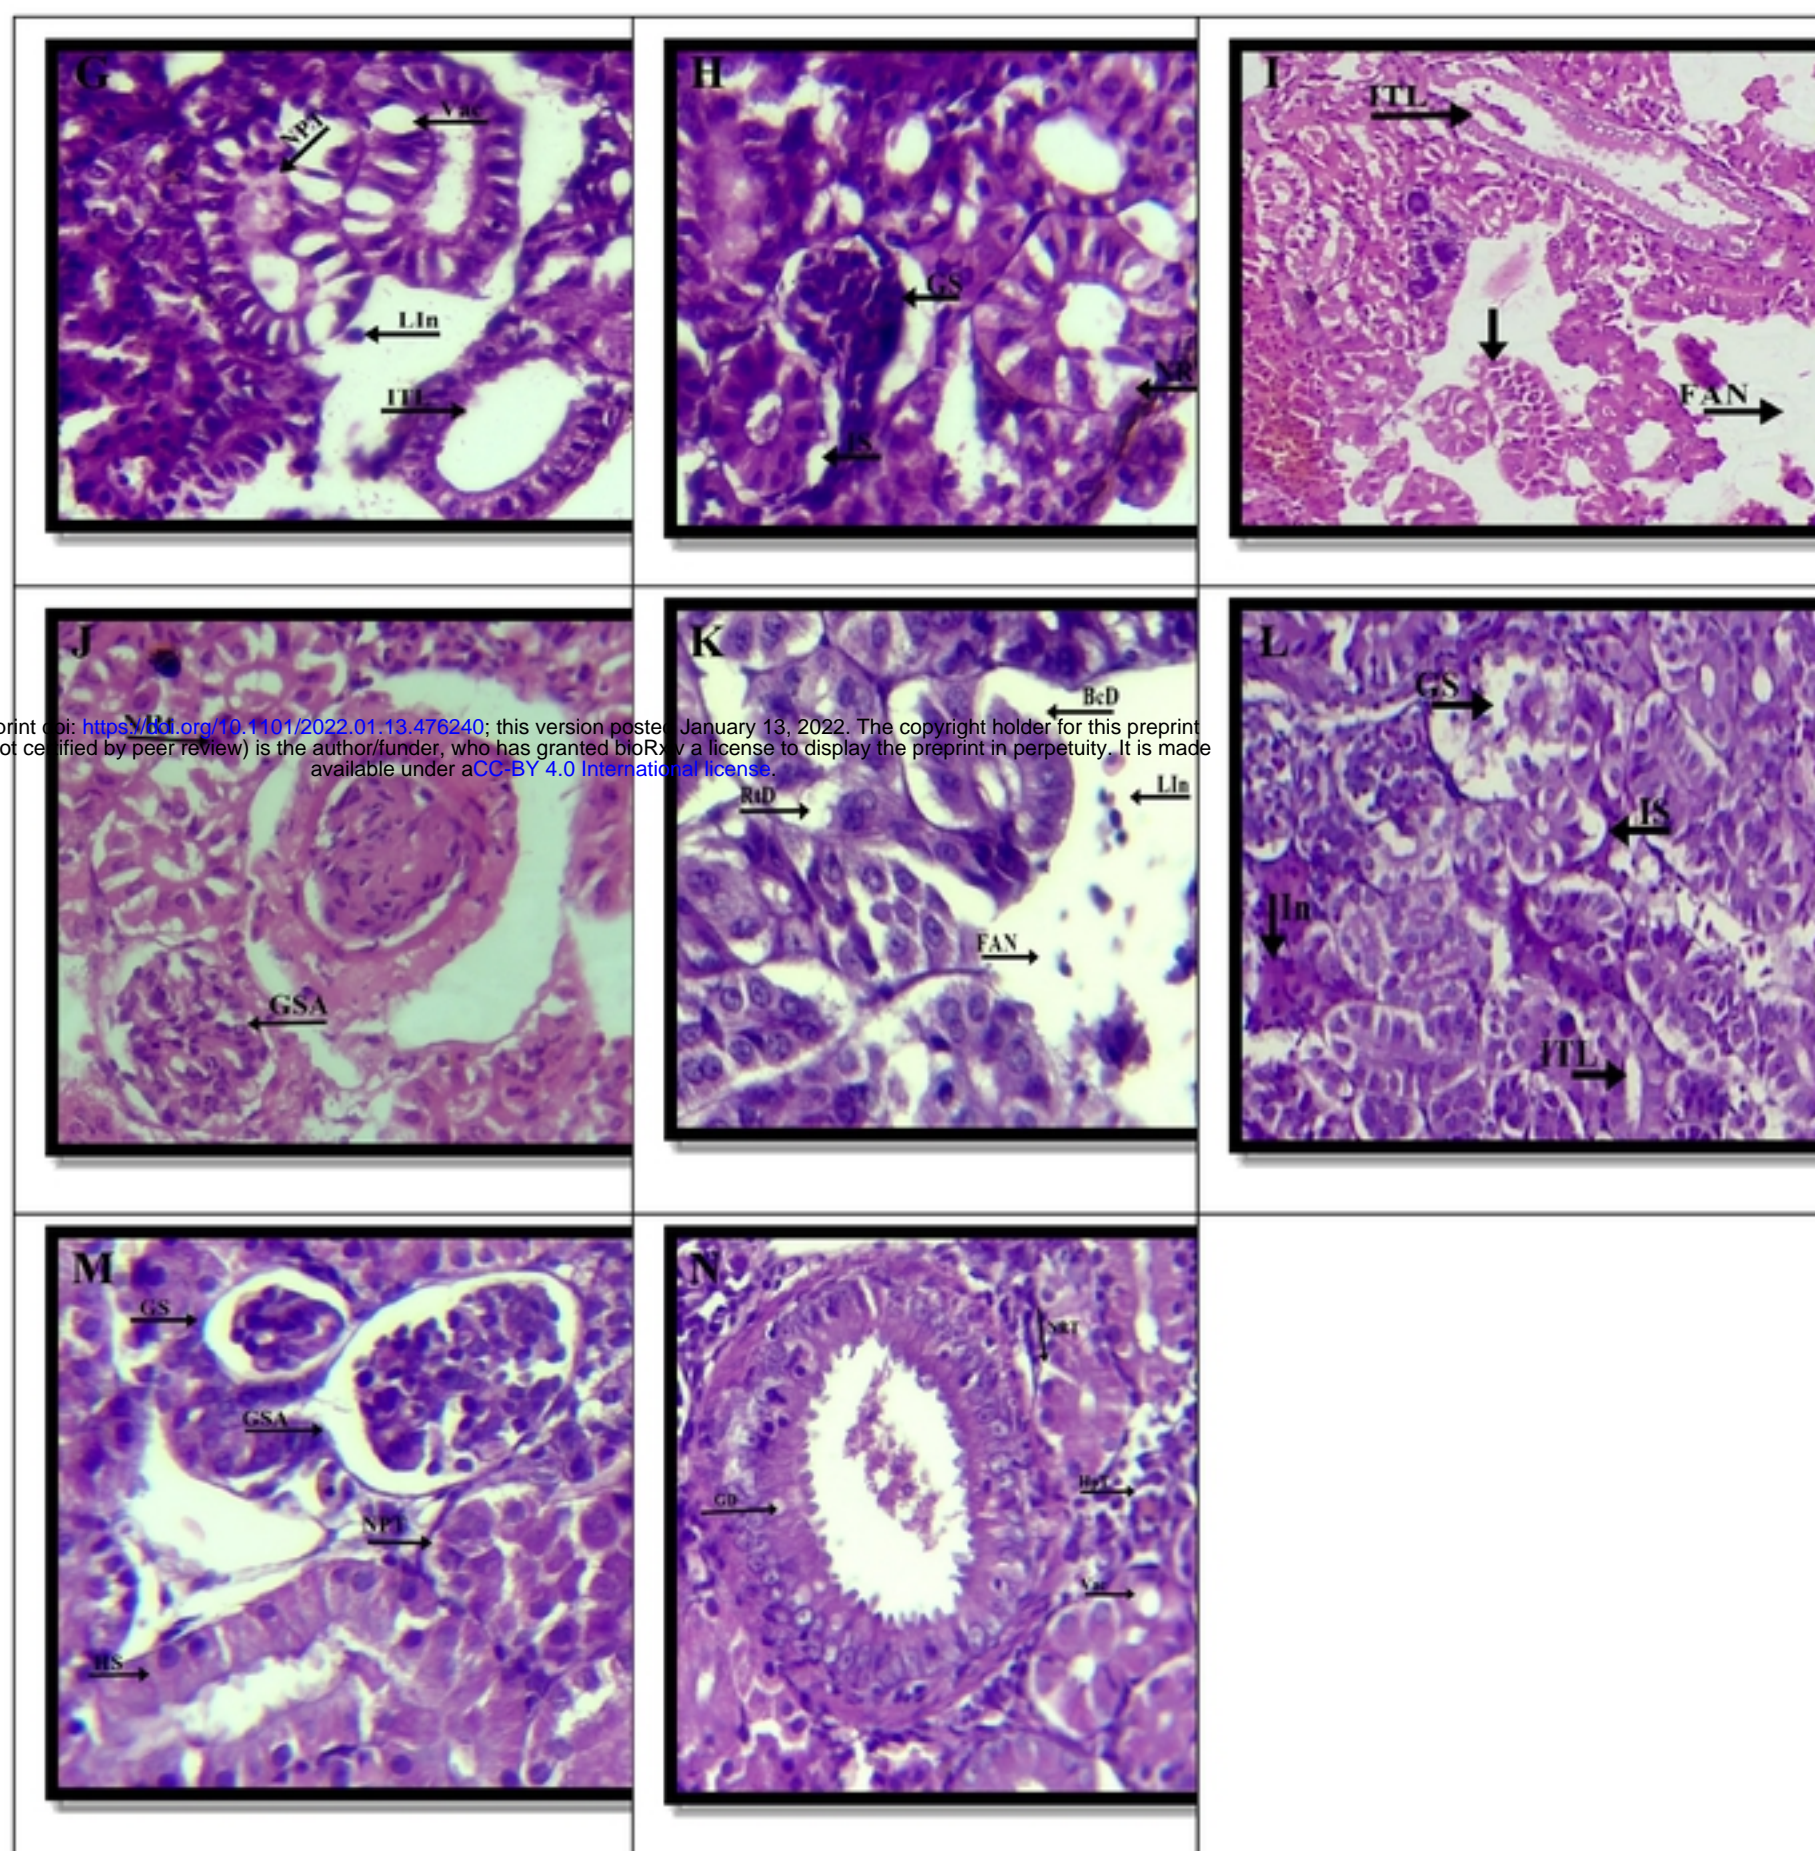

**Figure 4: Histopathological alteration of transversely paraffin sectioned of Kidney of *Oreochromis niloticus* electron micrographs (10×&40×) (H&E). (A&B) Control, (C-F) 1/3<sup>rd</sup> of LC<sub>50</sub>, (G-J) 1/5<sup>th</sup> of LC<sub>50</sub>, (K-N) 1/10<sup>th</sup> of LC<sub>50</sub>. Normal structure of kidney tissues was observed in the control fishes. Abbreviations are as= Hem=Hemorrhage, FAN= Focal area of necrosis, GD= Glomerulus arteries degeneration, NPT= Necrotic proximal tubule, IGS=Increase Glomerulus space, GSA=Glomerulus structural alteration, BcD= Bowman's capsule disintegration, GS=Glomerulus shrinkage, NRT=Necrotic renal tubule, HS=Hydropic swelling, ITL=Increase tubular lumen, Vac=vacuolar degeneration, HpT=Hematopoietic tissue Necrosis, RtD=Renal tubule degeneration and Lin=Leukocyte infiltration**

bioRxiv preprint doi: <https://doi.org/10.1101/2022.01.13.476240>; this version posted January 13, 2022. The copyright holder for this preprint (which was not certified by peer review) is the author/funder, who has granted bioRxiv a license to display the preprint in perpetuity. It is made available under aCC-BY 4.0 International license.

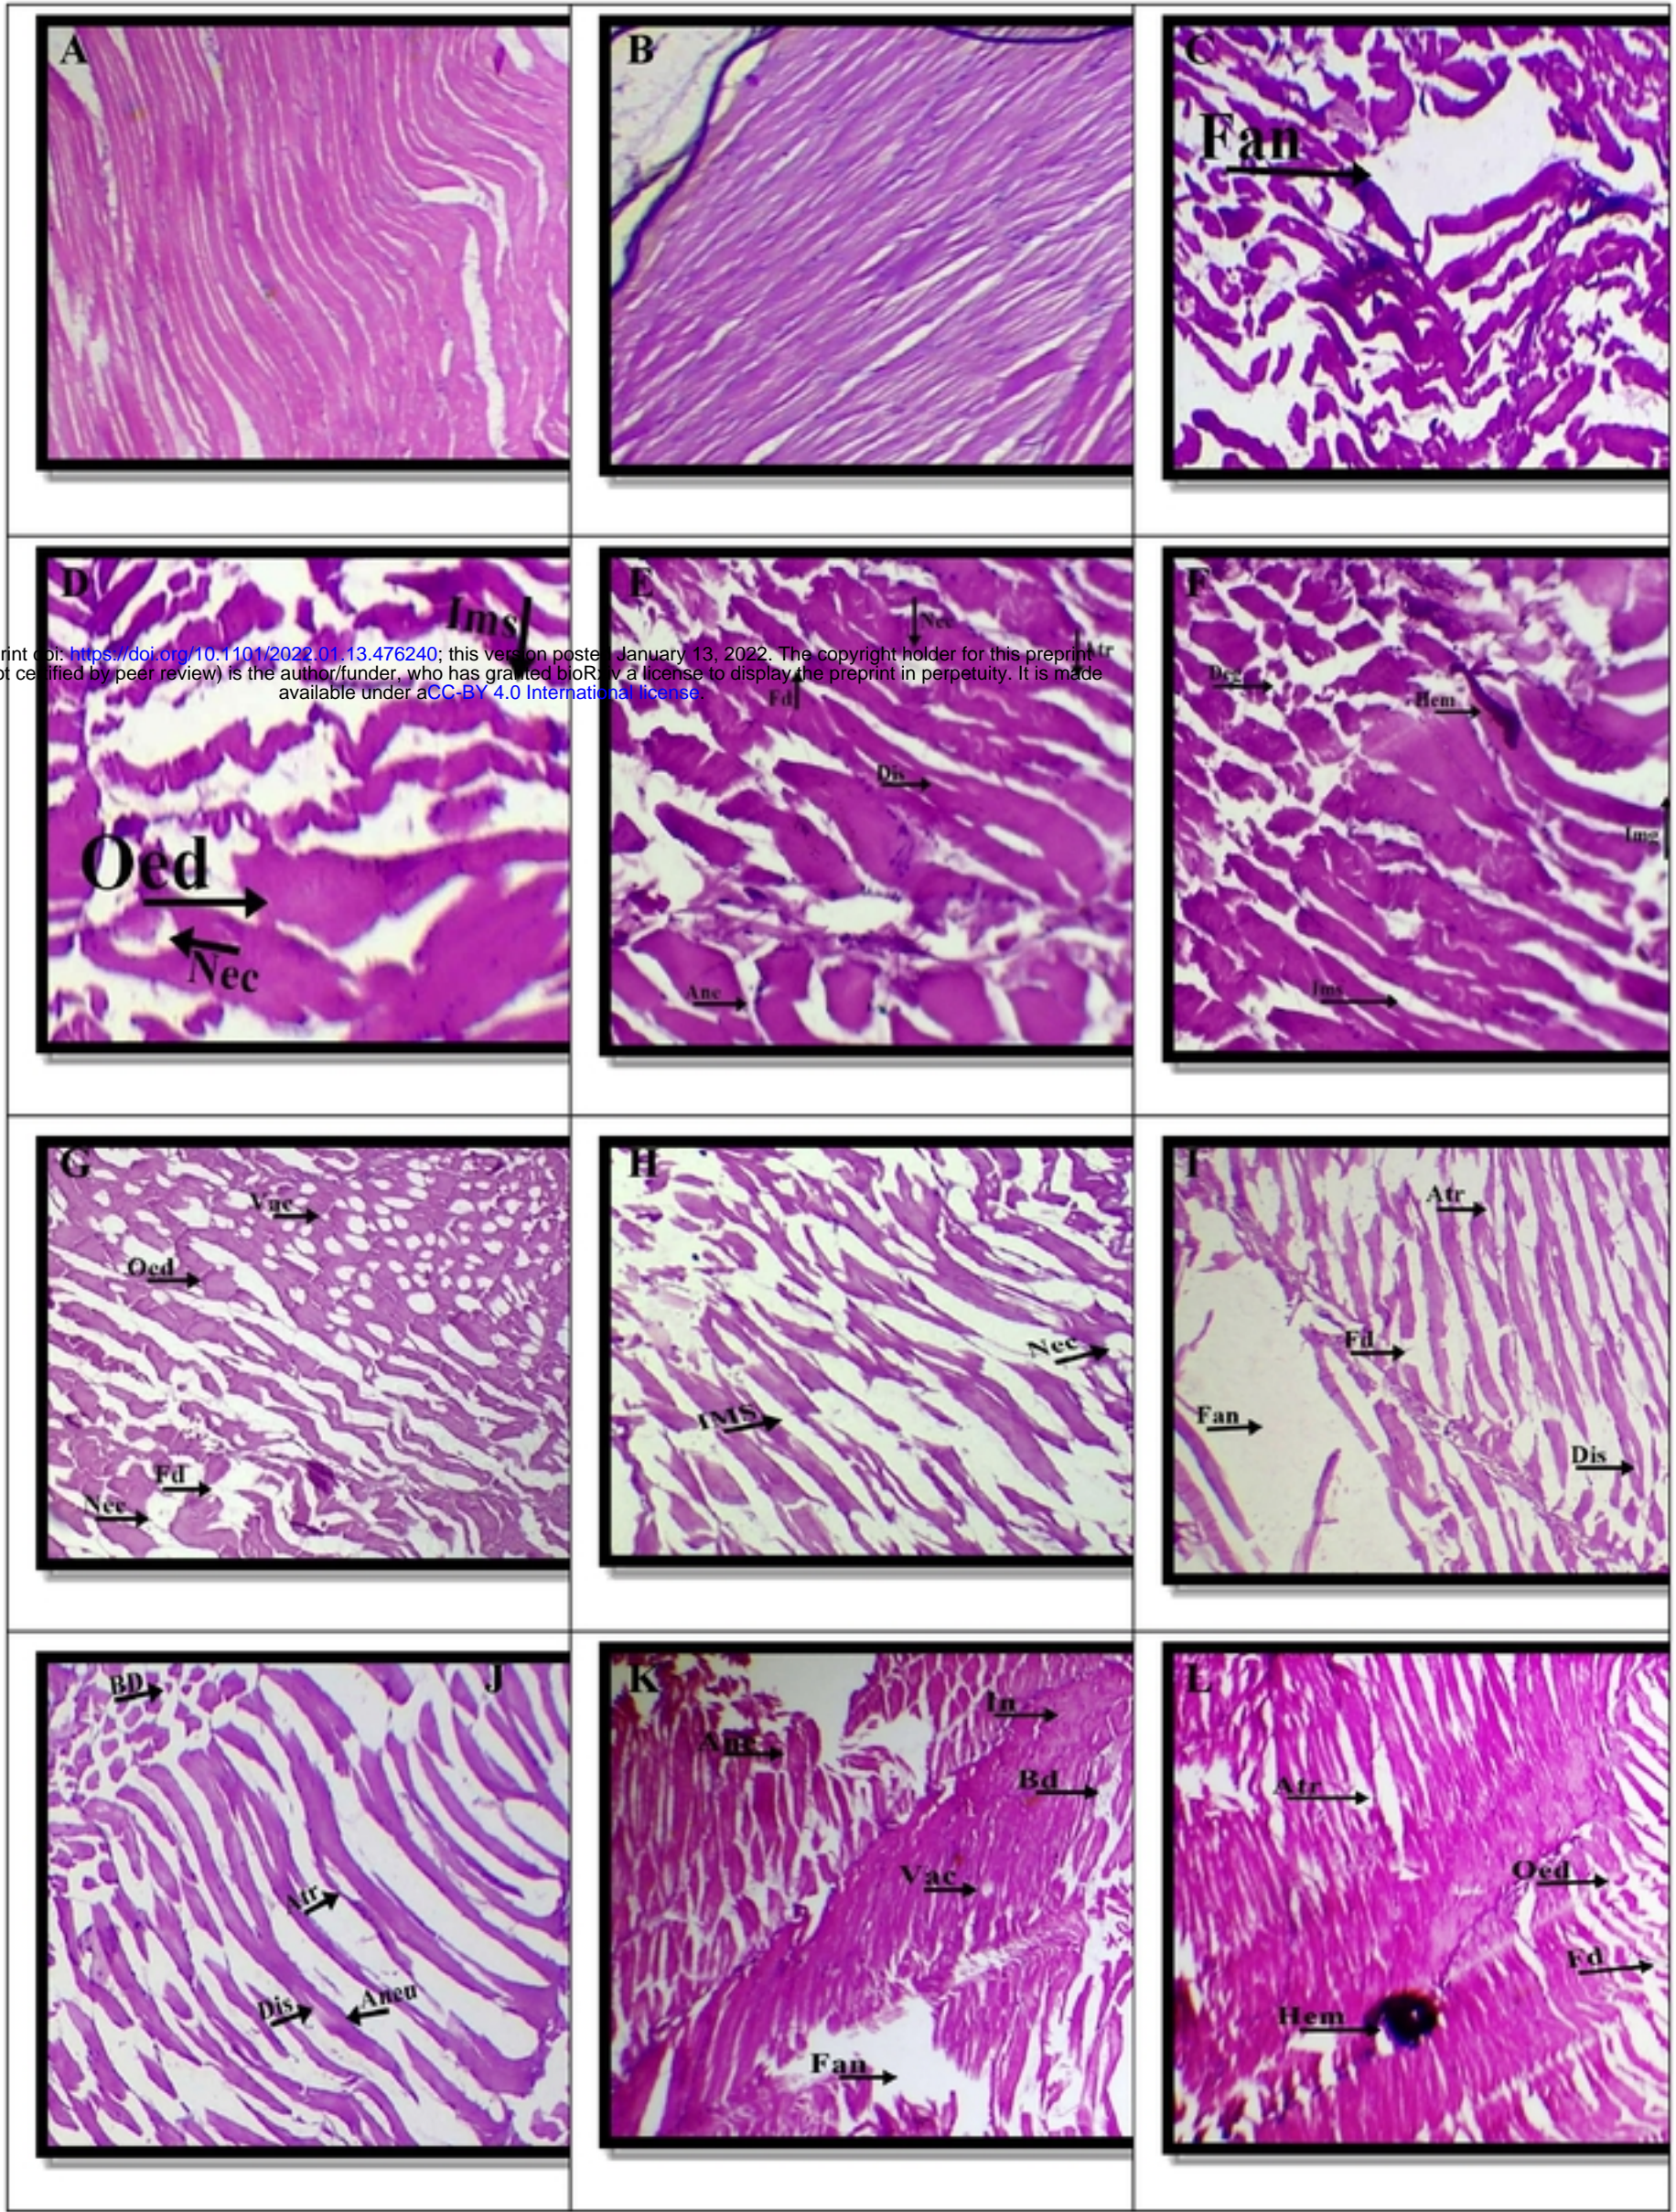

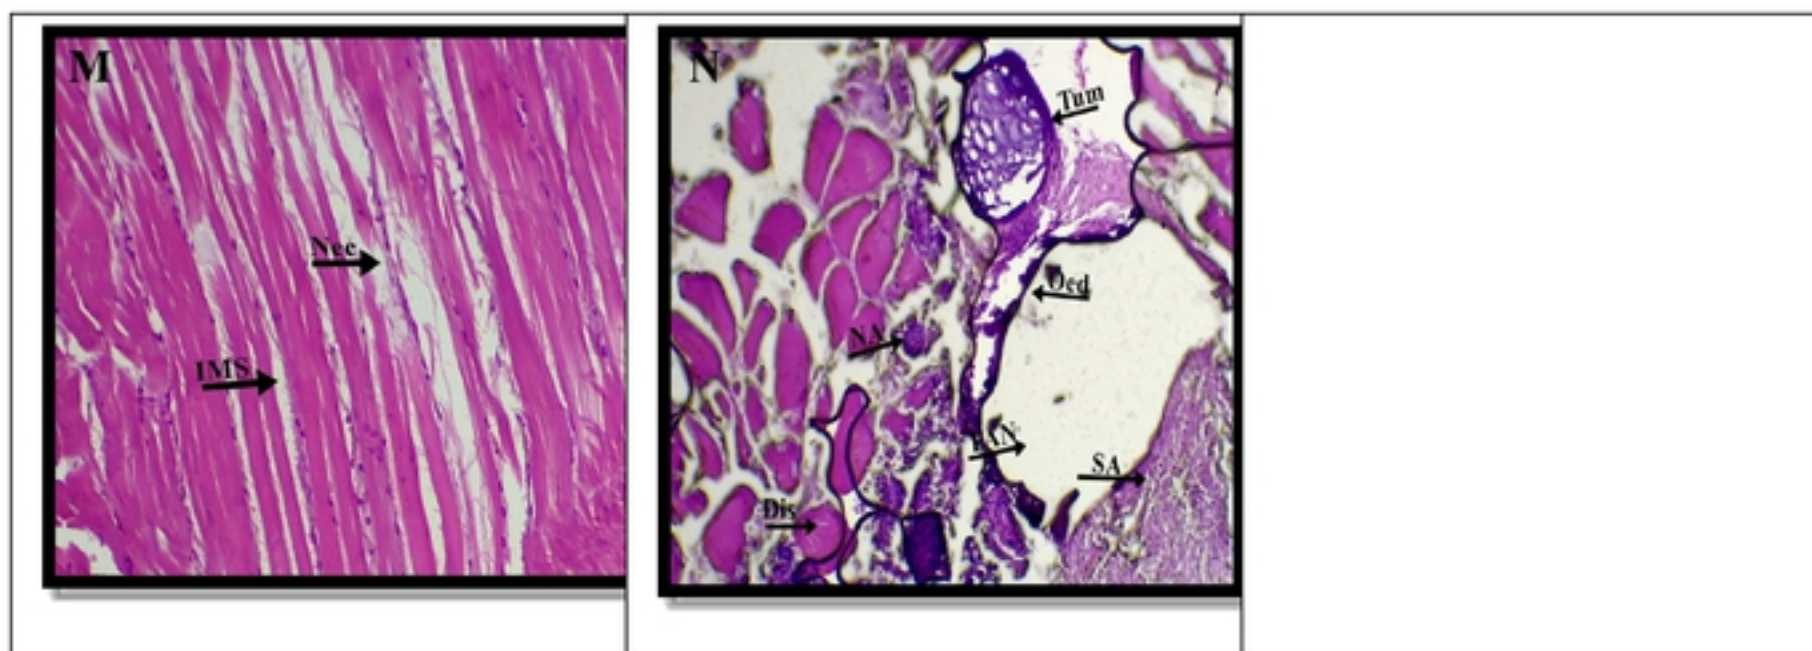

bioRxiv preprint doi: <https://doi.org/10.1101/2022.01.13.476240>; this version posted January 13, 2022. The copyright holder for this preprint (which was not certified by peer review) is the author/funder, who has granted bioRxiv a license to display the preprint in perpetuity. It is made available under aCC-BY 4.0 International license.

**Figure 5: Histopathological alteration of transversely paraffin sectioned of muscle of *Oreochromis niloticus* exposed to 100% of LC<sub>50</sub>, (G-I) 1/5<sup>th</sup> of LC<sub>50</sub>, (J) 1/10<sup>th</sup> of LC<sub>50</sub>, (K-N) 1/10<sup>th</sup> of LC<sub>50</sub>. Normal architecture of muscle tissues were observed in the control fishes. Abbreviations are as= Hem=Hemorrhage, Oed=Oedema, Fd=Fiber damage, Aneu=Aneurysm, Atr=Atrophy, Bd=Bundle damage, Vac=Vacuolar degeneration, FAN=focal area of necrosis, Nec=Necrosis, IMS=Inter myofibril spaces, Dis=Disintegration, SA=Structural Alteration, NA=Nuclear Alteration, In=Inflammation and Tum=Tumor**

**Table 1: Physio-Chemical Parameter of Industrial Effluents of Sunder Industrial Estate, Lahore**

| Physico-Chemical Parameters         | Leather Industry | Textile Industry | Chemical-I Industry | Chemical-II Industry | Control        | Suitable Ranges |
|-------------------------------------|------------------|------------------|---------------------|----------------------|----------------|-----------------|
| pH                                  |                  | 7.17333±0.65     | 9.13333±1.53        | 8.08333±0.74         |                | 6.5-8.5         |
| EC (µScm-1)                         | 5835±794.21      | 1686.33±13.76    | 1629±20.53          | 1961±42.95           | 627.667±2.52   | Up to 1650      |
| TDS mgL <sup>-1</sup>               | 4959.33±675.17   | 1393.5±37.96     | 1401.13±50.42       | 1666.73±36.64        | 356.867±303.86 | Up to 1000      |
| Total Salinity mgL <sup>-1</sup>    | 4959.33±675.17   | 1.385±0.27       | 1.37±0.25           | 1.665±0.13           | 5.33±1         | Less than 1000  |
| CO <sub>2</sub> mgL <sup>-1</sup>   | Nil              | 200±4.47         | 200±4.47            | 220±22.36            | 200±5          | 0-15            |
| Chloride mgL <sup>-1</sup>          | 1010.21±321.39   | 445.167±57.64    | 1250.64±1150.93     | 347.125±96.51        | 350±5          | 10-400          |
| Mg mgL <sup>-1</sup>                | 130±142.44       | 90±98.65         | 346.667±128.72      | 460.833±88.68        | 220±5          | Less than 20    |
| Ca mgL <sup>-1</sup>                | 320±65.88        | 720±416.29       | 370±11.83           | 333.333±36.96        | 213.333±12.58  | 60-120          |
| Total Alkalinity mgL <sup>-1</sup>  | 1055±897.78      | 1111±174.21      | 807±121.33          | 909.5±28.21          | 680±5          | 50-400          |
| Carbon Alkalinity mgL <sup>-1</sup> | 585±640.84       | 1111±174.21      | 807.5±120.41        | 909.5±28.21          | 680±5          | 0-100           |
| P. Alkalinity mgL <sup>-1</sup>     | 826.667±107.74   | Nil              | Nil                 | Nil                  | Nil            | 30-400          |
| Total Hardness mgL <sup>-1</sup>    | 380±153.43       | 560±44.05        | 716.667±139.31      | 790±120.58           | 420±5          | 60-120          |

Values are expressed as mean+S.D.

All the samples were analyzed in triplicates

**Table 2: Frequency and prevalence percentage (%) of histological alterations in the heart of *Oreochromis niloticus* exposed to sub-lethal levels of industrial effluents of Sunder Industrial Estate, Lahore**

| Histological Alteration | Control   |   | Treatment Groups |    |           |    |           |    |
|-------------------------|-----------|---|------------------|----|-----------|----|-----------|----|
|                         | Group A   |   | Group B          |    | Group C   |    | Group D   |    |
|                         | Frequency | % | Frequency        | %  | Frequency | %  | Frequency | %  |
| Hemorrhage              | 0         | 0 | 1                | 3  | 3         | 10 | 5         | 16 |
| Oedema                  | 0         | 0 | 8                | 26 | 13        | 43 | 19        | 63 |
| Pericardium bending     | 0         | 0 | -                | -  | 5         | 16 | 8         | 26 |
| Pericardium lifting     | 0         | 0 | -                | -  | 4         | 13 | 5         | 16 |
| Aneurysm                | 0         | 0 | 7                | 23 | 12        | 40 | 16        | 53 |
| Atrophy                 | 0         | 0 | 7                | 23 | 15        | 50 | 20        | 66 |
| Pericardium Damage      | 0         | 0 | -                | -  | 2         | 6  | 5         | 16 |
| Vacuolar degeneration   | 0         | 0 | 5                | 16 | 6         | 20 | 9         | 30 |
| focal area of necrosis  | 0         | 0 | 4                | 13 | 10        | 33 | 16        | 53 |
| Necrosis                | 0         | 0 | 5                | 16 | 18        | 60 | 13        | 43 |
| Hyperplasia             | 0         | 0 | 2                | 6  | 8         | 26 | 16        | 53 |
| Leucocytes Infiltration | 0         | 0 | 1                | 3  | 2         | 6  | 8         | 26 |
| Myocarditis             | 0         | 0 | 1                | 3  | 6         | 20 | 2         | 6  |
| Mean Value              |           |   | 41               |    | 104       |    | 142       |    |

bioRxiv preprint doi: <https://doi.org/10.1101/2022.01.13.476240>; this version posted January 13, 2022. The copyright holder for this preprint (which was not certified by peer review) is the author/funder, who has granted bioRxiv a license to display the preprint in perpetuity. It is made available under aCC-BY 4.0 International license.

**Table 3: Histological alterations index (HAI) calculated for determination of lesions in the Heart of *Oreochromis niloticus* exposed to sub-lethal level of industrial effluents of Sunder Industrial Estate, Lahore**

| Histologic Alteration               | Importance factor   | Index           | Score Value (a)                    |                                    |                                     | HAI Value (a×w)                    |                                    |                                     |
|-------------------------------------|---------------------|-----------------|------------------------------------|------------------------------------|-------------------------------------|------------------------------------|------------------------------------|-------------------------------------|
|                                     |                     |                 | 1/3 <sup>rd</sup> LC <sub>50</sub> | 1/5 <sup>th</sup> LC <sub>50</sub> | 1/10 <sup>th</sup> LC <sub>50</sub> | 1/3 <sup>rd</sup> LC <sub>50</sub> | 1/5 <sup>th</sup> LC <sub>50</sub> | 1/10 <sup>th</sup> LC <sub>50</sub> |
| Hemorrhage                          | W <sub>HC1</sub> =1 | I <sub>HC</sub> | 1                                  | 1                                  | 1                                   | 1                                  | 1                                  | 1                                   |
| Oedema                              | W <sub>HC2</sub> =1 |                 | 2                                  | 2                                  | 2                                   | 2                                  | 2                                  | 2                                   |
| Pericardium bending                 | W <sub>HR1</sub> =1 | I <sub>HR</sub> | -                                  | 1                                  | 2                                   | -                                  | 1                                  | 2                                   |
| Pericardium lifting                 | W <sub>HR2</sub> =1 |                 | -                                  | 1                                  | 1                                   | -                                  | 1                                  | 1                                   |
| Aneurysm                            | W <sub>HR3</sub> =1 |                 | 1                                  | 2                                  | 2                                   | 1                                  | 2                                  | 2                                   |
| Atrophy                             | W <sub>HR4</sub> =2 |                 | 1                                  | 2                                  | 2                                   | 2                                  | 4                                  | 4                                   |
| Pericardium Damage                  | W <sub>HR5</sub> =1 |                 | -                                  | 1                                  | 1                                   | -                                  | 1                                  | 1                                   |
| Vacuolar degeneration               | W <sub>HR6</sub> =2 |                 | 1                                  | 1                                  | 2                                   | 2                                  | 2                                  | 4                                   |
| focal area of necrosis              | W <sub>HR7</sub> =3 | I <sub>HP</sub> | 1                                  | 2                                  | 2                                   | 3                                  | 6                                  | 6                                   |
| Necrosis                            | W <sub>HR8</sub> =3 |                 | 1                                  | 2                                  | 2                                   | 3                                  | 6                                  | 6                                   |
| Hyperplasia                         | W <sub>HP1</sub> =2 | I <sub>HI</sub> | 1                                  | 2                                  | 2                                   | 2                                  | 4                                  | 4                                   |
| Leucocytes Infiltration             | W <sub>HP1</sub> =2 |                 | 1                                  | 1                                  | 2                                   | 2                                  | 2                                  | 4                                   |
| Myocarditis                         | W <sub>HP2</sub> =1 |                 | 1                                  | 1                                  | 1                                   | 1                                  | 1                                  | 1                                   |
| Mean value of HAI <sub>Kidney</sub> |                     |                 |                                    |                                    |                                     | 19                                 | 33                                 | 38                                  |

- HC= Heart circulatory disturbance; HR= Heart regressive changes; HP= Heart progressive changes; HI= Heart Inflammation

**Table 4: Frequency and prevalence percentage (%) of histological alterations in the Kidney of *Oreochromis niloticus* exposed to sub-lethal level of industrial effluents of Sunder Industrial Estate, Lahore**

| Histological Alterations         | Control   |   | Treatment Groups                   |    |                                    |    |                                     |    |
|----------------------------------|-----------|---|------------------------------------|----|------------------------------------|----|-------------------------------------|----|
|                                  | Frequency | % | 1/3 <sup>rd</sup> LC <sub>50</sub> |    | 1/5 <sup>th</sup> LC <sub>50</sub> |    | 1/10 <sup>th</sup> LC <sub>50</sub> |    |
|                                  |           |   | Frequency                          | %  | Frequency                          | %  | Frequency                           | %  |
| Glomerulus shrinkage             | 0         | 0 | 6                                  | 20 | 9                                  | 30 | 22                                  | 73 |
| Focal area of necrosis           | 0         | 0 | 8                                  | 26 | 13                                 | 43 | 21                                  | 70 |
| Glomerulus arteries degeneration | 0         | 0 | 5                                  | 16 | 8                                  | 26 | 10                                  | 33 |
| Necrotic proximal tubule         | 0         | 0 | 15                                 | 50 | 9                                  | 30 | 16                                  | 53 |
| Glomerulus structural alteration | 0         | 0 | 3                                  | 10 | 10                                 | 33 | 25                                  | 83 |
| Hemorrhage                       | 0         | 0 | 1                                  | 3  | 3                                  | 10 | 7                                   | 23 |
| Necrotic renal tubule            | 0         | 0 | 5                                  | 16 | 6                                  | 20 | 9                                   | 30 |
| Increase tubular lumen           | 0         | 0 | 10                                 | 33 | 7                                  | 23 | 17                                  | 56 |
| vacuolar degeneration            | 0         | 0 | 2                                  | 6  | 5                                  | 16 | 8                                   | 26 |
| Necrosis                         | 0         | 0 | 6                                  | 20 | 7                                  | 23 | 12                                  | 40 |
| Renal tubule degeneration        | 0         | 0 | 5                                  | 16 | 8                                  | 26 | 10                                  | 33 |
| Bowman's capsule disintegration  | 0         | 0 | 6                                  | 20 | 10                                 | 33 | 16                                  | 53 |
| Hydropic swelling                | 0         | 0 | 4                                  | 13 | 7                                  | 23 | 11                                  | 36 |
| Leukocyte infiltration           | 0         | 0 | 3                                  | 10 | 4                                  | 13 | 6                                   | 20 |
| Mean Value                       |           |   | 86                                 |    | 111                                |    | 199                                 |    |

bioRxiv preprint doi: <https://doi.org/10.1101/2022.01.13.476240>; this version posted January 13, 2022. The copyright holder for this preprint (which was not certified by peer review) is the author/funder, who has granted bioRxiv a license to display the preprint in perpetuity. It is made available under aCC-BY 4.0 International license.

**Table 5: Histological alterations index (HAI) calculated for determination of lesions in the Kidney of *Oreochromis niloticus* exposed to sub-lethal level of industrial effluents of Sunder Industrial Estate, Lahore**

| Histological alterations         | Importance factor (w) | Index           | Score Value (a)                    |                                    |                                     | HAI Value ( a×w)                   |                                    |                                     |
|----------------------------------|-----------------------|-----------------|------------------------------------|------------------------------------|-------------------------------------|------------------------------------|------------------------------------|-------------------------------------|
|                                  |                       |                 | 1/3 <sup>rd</sup> LC <sub>50</sub> | 1/5 <sup>th</sup> LC <sub>50</sub> | 1/10 <sup>th</sup> LC <sub>50</sub> | 1/3 <sup>rd</sup> LC <sub>50</sub> | 1/5 <sup>th</sup> LC <sub>50</sub> | 1/10 <sup>th</sup> LC <sub>50</sub> |
| Hemorrhage                       | W <sub>KC1</sub> =1   | I <sub>KC</sub> | 1                                  | 2                                  | 3                                   | 1                                  | 2                                  | 3                                   |
| Focal area of necrosis           | W <sub>KC1</sub> =1   | I <sub>KR</sub> | 1                                  | 2                                  | 3                                   | 1                                  | 2                                  | 3                                   |
| Glomerulus arteries degeneration | W <sub>KR2</sub> =1   |                 | 1                                  | 2                                  | 3                                   | 1                                  | 2                                  | 3                                   |
| Necrotic proximal tubule         | W <sub>KR3</sub> =3   |                 | 3                                  | 2                                  | 3                                   | 9                                  | 6                                  | 9                                   |
| Increase Glomerulus space        | W <sub>KR4</sub> =1   |                 | 1                                  | 2                                  | 3                                   | 1                                  | 2                                  | 3                                   |
| Glomerulus structural alteration | W <sub>KR5</sub> =2   |                 | 1                                  | 2                                  | 3                                   | 2                                  | 4                                  | 6                                   |

|                                           |              |                       |   |   |   |    |    |    |
|-------------------------------------------|--------------|-----------------------|---|---|---|----|----|----|
| <b>Glomerulus shrinkage</b>               | $W_{KR6}=2$  |                       | 1 | 2 | 3 | 2  | 4  | 6  |
| <b>Necrotic renal tubule</b>              | $W_{KR7}=2$  |                       | 1 | 2 | 3 | 2  | 4  | 6  |
| <b>Increase tubular lumen</b>             | $W_{KR8}=3$  |                       | 2 | 1 | 3 | 6  | 3  | 9  |
| <b>vacuolar degeneration</b>              | $W_{KR9}=1$  |                       | 1 | 2 | 3 | 1  | 2  | 3  |
| <b>Bowman's capsule disintegration</b>    | $W_{KR10}=1$ |                       | 1 | 2 | 2 | 1  | 2  | 2  |
| <b>Hydropic swelling</b>                  | $W_{KR11}=1$ |                       | 1 | 1 | 2 | 1  | 1  | 2  |
| <b>Necrosis</b>                           | $W_{KP1}=1$  | <b>I<sub>KP</sub></b> | 2 | 2 | 3 | 2  | 2  | 3  |
| <b>Renal tubule degeneration</b>          | $W_{KP2}=1$  |                       | 1 | 2 | 3 | 1  | 2  | 3  |
| <b>Leukocyte infiltration</b>             | $W_{KI1}=1$  | <b>I<sub>KI</sub></b> | 1 | 2 | 3 | 1  | 2  | 4  |
| <b>Mean value of HAI<sub>Kidney</sub></b> |              |                       |   |   |   | 32 | 40 | 60 |

bioRxiv preprint doi: <https://doi.org/10.1101/2022.01.13.476240>; this version posted January 13, 2022. The copyright holder for this preprint (which was not certified by peer review) is the author/funder, who has granted bioRxiv a license to display the preprint in perpetuity. It is made available under aCC-BY 4.0 International license.

• **KC** = Kidney circulatory disturbance; **KR** = Kidney regressive changes; **KP** = Kidney progressive changes; **KI** = Kidney inflammation

**Table 6: Frequency and prevalence percentage (%) of histological alterations in the Muscle of *Oreochromis niloticus* exposed to sub-lethal levels of industrial effluents of Sunder Industrial Estate, Lahore**

| Histological Alteration       | Control   |   | Treatment Groups |    |            |    |            |    |
|-------------------------------|-----------|---|------------------|----|------------|----|------------|----|
|                               | Group A   |   | Group B          |    | Group C    |    | Group D    |    |
|                               | Frequency | % | Frequency        | %  | Frequency  | %  | Frequency  | %  |
| <b>Atrophy</b>                | 0         | 0 | 9                | 30 | 15         | 43 | 20         | 66 |
| <b>Oedema</b>                 | 0         | 0 | 7                | 23 | 14         | 46 | 18         | 60 |
| <b>Hemorrhage</b>             | 0         | 0 | -                | -  | 1          | 3  | 7          | 23 |
| <b>Fiber damage</b>           | 0         | 0 | 9                | 30 | 12         | 40 | 17         | 56 |
| <b>Aneurysm</b>               | 0         | 0 | 8                | 26 | 11         | 36 | 16         | 53 |
| <b>Inflammation</b>           | 0         | 0 | 5                | 16 | 8          | 26 | 11         | 36 |
| <b>Bundle damage</b>          | 0         | 0 | 6                | 20 | 10         | 33 | 15         | 50 |
| <b>Vacuolar degeneration</b>  | 0         | 0 | 4                | 13 | 6          | 20 | 10         | 33 |
| <b>focal area of necrosis</b> | 0         | 0 | 5                | 15 | 12         | 40 | 18         | 60 |
| <b>Necrosis</b>               | 0         | 0 | 6                | 20 | 22         | 73 | 16         | 53 |
| <b>Inter myofibril spaces</b> | 2         | 6 | 10               | 33 | 18         | 60 | 25         | 83 |
| <b>Disintegration</b>         | 0         | 0 | 8                | 26 | 15         | 50 | 20         | 66 |
| <b>Tumor</b>                  | 0         | 0 | -                | -  | -          | -  | 3          | 10 |
| <b>Structural Alteration</b>  | 0         | 0 | -                | -  | -          | -  | 10         | 33 |
| <b>Nuclear Alteration</b>     | 0         | 0 | -                | -  | -          | -  | 7          | 23 |
| <b>Mean Value</b>             | <b>2</b>  |   | <b>77</b>        |    | <b>144</b> |    | <b>215</b> |    |

**Table 7: Histological alterations index (HAI) calculated for determination of lesions in the Muscle of *Oreochromis niloticus* exposed to sub-lethal level of industrial effluents of Sunder Industrial Estate, Lahore**

|  |  |  |                        |                         |
|--|--|--|------------------------|-------------------------|
|  |  |  | <b>Score Value (a)</b> | <b>HAI Value ( a×w)</b> |
|--|--|--|------------------------|-------------------------|



| Historical Alteration               | Importance factor    | Index                 | 1/3 <sup>rd</sup> LC <sub>50</sub> | 1/5 <sup>th</sup> LC <sub>50</sub> | 1/10 <sup>th</sup> LC <sub>50</sub> | 1/3 <sup>rd</sup> LC <sub>50</sub> | 1/5 <sup>th</sup> LC <sub>50</sub> | 1/10 <sup>th</sup> LC <sub>50</sub> |
|-------------------------------------|----------------------|-----------------------|------------------------------------|------------------------------------|-------------------------------------|------------------------------------|------------------------------------|-------------------------------------|
| Hemorrhage                          | W <sub>MC1</sub> =1  | <b>I<sub>MC</sub></b> | -                                  | 1                                  | 1                                   | -                                  | 1                                  | 1                                   |
| Oedema                              | W <sub>MC2</sub> =1  |                       | 1                                  | 2                                  | 2                                   | 1                                  | 2                                  | 2                                   |
| Fiber damage                        | W <sub>MR1</sub> =1  | <b>I<sub>MR</sub></b> | 2                                  | 2                                  | 2                                   | 2                                  | 2                                  | 2                                   |
| Aneurysm                            | W <sub>MR2</sub> =1  |                       | 2                                  | 2                                  | 2                                   | 2                                  | 2                                  | 2                                   |
| Atrophy                             | W <sub>MR3</sub> =2  |                       | 2                                  | 2                                  | 2                                   | 4                                  | 4                                  | 4                                   |
| Bundle damage                       | W <sub>MR4</sub> =1  |                       | 1                                  | 2                                  | 2                                   | 1                                  | 2                                  | 2                                   |
| Vacuolar degeneration               | W <sub>MR5</sub> =1  |                       | 1                                  | 1                                  | 2                                   | 1                                  | 1                                  | 2                                   |
| focal area of necrosis              | W <sub>MR6</sub> =3  |                       | 1                                  | 2                                  | 2                                   | 3                                  | 6                                  | 6                                   |
| Necrosis                            | W <sub>MR7</sub> =3  |                       | 1                                  | 2                                  | 2                                   | 3                                  | 6                                  | 6                                   |
| Inter myofibril spaces              | W <sub>MR8</sub> =1  |                       | 2                                  | 2                                  | 3                                   | 2                                  | 2                                  | 3                                   |
| Disintegration                      | W <sub>MR9</sub> =1  |                       | 2                                  | 2                                  | 2                                   | 2                                  | 2                                  | 2                                   |
| Structural Alteration               | W <sub>MR10</sub> =1 |                       | -                                  | -                                  | 2                                   | -                                  | -                                  | 2                                   |
| Nuclear Alteration                  | W <sub>MR11</sub> =2 |                       |                                    | 1                                  | -                                   | -                                  | 2                                  |                                     |
| Inflammation                        | W <sub>MI</sub> =1   | <b>I<sub>MI</sub></b> | 1                                  | 2                                  | 4                                   | 1                                  | 2                                  | 4                                   |
| Tumor                               | W <sub>MT</sub> =3   | <b>I<sub>MT</sub></b> | -                                  | -                                  | 4                                   | -                                  | -                                  | 12                                  |
| Mean value of HAI <sub>Muscle</sub> |                      |                       |                                    |                                    |                                     | 22                                 | 32                                 | 52                                  |

bioRxiv preprint doi: <https://doi.org/10.1101/2022.01.13.476240>; this version posted January 13, 2022. The copyright holder for this preprint (which was not certified by peer review) is the author/funder, who has granted bioRxiv a license to display the preprint in perpetuity. It is made available under aCC-BY 4.0 International license.

- MC= Muscle circulatory disturbance; MR= Muscle regressive changes; MI= Muscle inflammation; MT= Muscle tumor
